1           **Perceived Quality of Care in Health Centers Affiliated with a**  
2           **Community-Based Health Insurance Scheme in Two Districts of**  
3           **Northeastern Ethiopia: A Multilevel Analysis**

4  
5           Mohammed Hussien [iD](#)<sup>1\*</sup>, Muluken Azage [iD](#)<sup>2</sup> and Negalign Berhanu Bayou [iD](#)<sup>3</sup>

6  
7  
8           <sup>1</sup>Department of Health Systems Management and Health Economics, School of Public Health,  
9           College of Medicine and Health Sciences, Bahir Dar University, Bahir Dar, Ethiopia.

10          <sup>2</sup>Department of Environmental Health, School of Public Health, College of Medicine and Health  
11          Sciences, Bahir Dar University, Bahir Dar, Ethiopia.

12          <sup>3</sup>Department of Health Policy and Management, Faculty of Public Health, Institute of Health,  
13          Jimma University, Jimma, Ethiopia.

14  
15  
16  
17          \*Correspondence: [muhamedun@gmail.com](mailto:muhamedun@gmail.com)

19 **ABSTRACT**

20 **Objectives:** The purpose of this study was to examine how clients perceived the quality of health  
21 care, and to identify related individual and facility-level factors.

22 **Design:** Community-based, cross-sectional

23 **Setting:** Health centers affiliated with community-based health insurance scheme

24 **Participants:** 1081 rural households that had ever been enrolled in community-based health  
25 insurance and had visited a health center at least once in the previous 12 months, as well as 194  
26 health care providers working in 12 health centers.

27 **Outcome measures:** The outcome variable of interest was the overall perceived quality of score,  
28 which was measured using a 17-item scale. Respondents were asked to rate the degree to which  
29 they agreed on 5-point response items relating to their experiences with health care in the  
30 outpatient departments of nearby health centers. A multilevel linear regression analysis was used  
31 to identify predictors of quality of care.

32 **Results:** The mean perceived quality of care score was 62.85 (SD=10.49). Five quality of care  
33 dimensions were extracted from the factor analysis, with patient-provider communication  
34 dimension having the highest mean score (M=72.29, SD=12.66) and information provision  
35 having the lowest (M=55.83, SD=17.34). Wealth status, current insurance status, perceived  
36 health status, presence of chronic illness, time since the most recent visit to a health center,  
37 patient volume and health care providers' work experience were significantly associated with the  
38 perceived quality of care. An interaction term between patient volume and staff job satisfaction  
39 also showed significant association.

40 **Conclusions:** Much work remains to be done to improve the quality of care, in particular, on  
41 information provision and access to care quality dimensions. People's perceptions of the quality  
42 of care differed depending on a variety of individual and health center-level factors. For better  
43 quality of care, it is vital to determine an appropriate patient volume per care provider, and  
44 improve staff job satisfaction.

#### 45 **Strengths and limitations of this study**

- 46 ▶ The study tried to assess the quality of care from the clients' point of view using a  
47 validated multidimensional scale.
- 48 ▶ This is the first cross-sectional study in Ethiopia which considered health center (cluster)  
49 level variables that have association with the perceived quality of care.
- 50 ▶ We tested for endogeneity between current insurance status and quality of care, but there  
51 is still the possibility of endogeneity due to omitted variables, as a result of which active  
52 members may report higher care quality due to their desire to remain in the scheme.
- 53 ▶ Because of the cross-sectional nature of the study, it is impossible to establish a cause-  
54 and-effect relationship.

#### 55 **INTRODUCTION**

56 Health care providers and patients define the quality of care differently and attach varying levels  
57 of importance to its attributes. Health care practitioners tend to prioritize technical performance  
58 when assessing the quality of care, whereas patients underline the importance of patient-  
59 centeredness, amenities, and reputation.<sup>1</sup> The emphasis on health care quality measurement has  
60 shifted away from the viewpoints of health care providers to people-centered approaches that  
61 rely on patient perceptions.<sup>2-4</sup> Patients' perception of health care quality has become an essential  
62 element of quality measurement due to its link with health service utilization. It is based on a mix

63 of patient experiences, processed information and rumors.<sup>5</sup> Patient experience surveys elicit  
64 information on the transactional aspects of care, which are process-related, and relational aspects  
65 of care, which are the interpersonal interactions that occur during the care.<sup>6</sup> Individuals receiving  
66 the care are asked about their experiences of a health facility encounter to report whether or not  
67 certain processes or events occurred.<sup>7</sup> Patient experience measurements have received increased  
68 attention and are widely employed to inform quality improvement, and pay-for-performance.<sup>8</sup>  
69 Patient experience is consistently and positively associated with patient safety and clinical  
70 effectiveness, the technical quality of care delivery,<sup>9</sup> adherence to prevention and treatment  
71 recommendations, and less resource utilization.<sup>9 10</sup>

72 Quality of health care is vital to the success of universal health coverage (UHC) initiatives, like  
73 community-based health insurance (CBHI). The development of CBHI schemes must be  
74 accompanied by improvements in the quality of care.<sup>11 12</sup> To build sustainable CBHI schemes,  
75 members must believe that the benefits of health care provided via health insurance coverage  
76 outweigh the benefits of not being insured.<sup>13</sup> Patients' positive experiences with the quality of  
77 care provided under insurance schemes increase their trust in the health system and insurance  
78 schemes.<sup>14 15</sup> This in turn enhances the utilization of health care and their decisions to participate  
79 in health insurance schemes.<sup>16</sup> If health care facilities fail to deliver high-quality services, clients  
80 lose faith in service providers and seek care elsewhere,<sup>17</sup> making insurance members less  
81 inclined to pay premiums.<sup>18 19</sup>

82 The ultimate goal of UHC is to ensure that all people who need health services receive high-  
83 quality care without financial strain.<sup>20</sup> Although increased health care coverage is promising with  
84 the implementation of CBHI, quality of care remains to be a key barrier to attaining UHC.<sup>20 21</sup>  
85 Increasing access to essential health services without improving their quality would not bring the

86 intended health outcomes.<sup>2 4</sup> For example, more than eight million deaths amenable to a high  
87 quality of care occurred in low- and middle-income countries (LMICs), making poor-quality of  
88 care a bigger obstacle to mortality reduction than lack of access to care.<sup>21</sup>

89 Poor quality of care is also a major issue that jeopardizes the long-term viability of many CBHI  
90 schemes.<sup>11 22</sup> Findings of systematic reviews revealed that the quality of care was a key factor  
91 that influences enrollment and renewal decisions of CBHI membership.<sup>23 24</sup> Some of the quality  
92 concerns include ‘unavailability and perceived poor quality of prescribed medicines,  
93 misbehavior of health professionals and the differential treatment of the insured in favor of the  
94 uninsured patients, unclean hospital environment, long queues, lack of diagnostic equipment, and  
95 long waiting hours to obtain health care’.<sup>24</sup>

96 The quality of health care funded by UHC needs to be measured continuously to promote  
97 appropriate utilization, stable financing, and better outcomes.<sup>17</sup> Previous studies in Ethiopia  
98 focused on surveys of client satisfaction and did not employ multidimensional measurement  
99 scales.<sup>25 26</sup> To the best of our knowledge, the quality of care under CBHI in Ethiopia has never  
100 been examined from the perspective of service users using multidimensional measurement scales  
101 and household surveys. There is also a paucity of literature on facility-level variables that  
102 influence the quality of care. Therefore, the purpose of this study was to examine the perceived  
103 quality of care (PQOC) from the clients' perspective, and identify individual and facility-level  
104 factors.

105 Improving quality of care and CBHI are among Ethiopia's top priorities in its health sector  
106 strategic plan.<sup>27</sup> The findings of this study will inform relevant stakeholders on the current state  
107 of clients' perceptions of the quality of care and will be an essential input for quality  
108 improvement initiatives. It will also provide useful information for decision-makers to address

109 challenges in the country's endeavor to establish higher-level insurance pools. Furthermore, it  
110 will add value to the existing literature, in particular, on factors that influence the quality of care.

## 111 **METHODS**

### 112 **Study setting**

113 The study was conducted in the rural parts of two neighboring districts in Northeastern Ethiopia,  
114 Tehulederie and Kalu. Tehulederie is divided into 20 rural and 7 urban *kebeles* (subdistricts) with  
115 an estimated total population of 145,625 of which 87.5% are residing in rural area. In the district,  
116 there are five health centers and one primary hospital. Tehulederie was one of the 13 districts in  
117 Ethiopia, where CBHI was piloted in 2011. The scheme was introduced in Kalu district after two  
118 years, in July 2013 (28). Kalu is divided into 36 rural and 4 urban *kebeles*, and has nine health  
119 centers. It is the most populous district in the zone, which has an estimated total population of  
120 234,624, of which 89.11% are living in the rural part.<sup>28</sup>

### 121 **Study design and population**

122 A community-based cross-sectional study with a quantitative method of data collection was  
123 conducted among rural households who have ever been enrolled in CBHI scheme before January  
124 2020. Households that reported no use of health care in the previous 12 months before data  
125 collection were excluded from the study to minimize recall bias. Furthermore, 194 health care  
126 providers from 12 health centers participated in the study to provide cluster level data.

### 127 **Study variables and measurement**

128 The outcome variable of interest for this study was the overall PQOC score. It was measured  
129 using a 17-item scale designed after a thorough review of the contents of previous instruments  
130 developed and validated in China,<sup>29 30</sup> Burkina Faso<sup>31 32</sup> and Ethiopia.<sup>33</sup> Respondents were asked

131 to rate the extent to which they agreed on a set of items relating to their experiences with the  
132 health care they received in the outpatient departments of the nearby health centers. Each item  
133 was designed on a 5-point response format with 1=strongly disagree, 2=disagree, 3=neutral,  
134 4=agree and 5=strongly agree. To allow for comparisons of summary scores of overall PQOC,  
135 quality dimensions, and measurement items on a common scale, the 5-point response was  
136 converted to scores of 0, 25, 50, 75 and 100 respectively.<sup>34</sup> When reporting the results, mean  
137 scores were arithmetically transformed to a scale of 0 to 100.

138 The predictor variables included age, gender, education and marital status of the household head;  
139 wealth status; household size; current health insurance status; presence of chronic illness in the  
140 household; perceived health status, and time since the most recent visit to a health center. Health  
141 care providers' work experience, affective commitment, job satisfaction and patient volume were  
142 cluster-level variables.

143 Wealth index was generated using the principal component analysis method. The scores for 15  
144 types of assets and utilities were translated into latent factors, and a wealth index was calculated  
145 based on the first factor that explained most of the variation. According to the wealth index, the  
146 study households were categorized into wealth tertile – lower, medium and higher wealth tertile.  
147 Perceived health status was measured based on a household head's subjective assessment of the  
148 health status of the household and was rated as “excellent, very good, good, fair, or poor”.  
149 However, for analysis purposes, it was recategorized into “fair, good, and very-good”, by  
150 merging the two extreme response categories with few frequencies to the next categories.

151 Affective commitment and job satisfaction are composite variables that were assessed using a 5-  
152 point Likert scale. Affective commitment was measured with a seven-item questionnaire based  
153 on a modified version of the Meyer et al. scale, which had previously been used in a hospital

154 setting.<sup>35</sup> Staff job satisfaction was measured using a 10-item scale which was adapted from a  
155 previous study among health care workers in Ethiopia.<sup>36</sup> Average affective commitment and job  
156 satisfaction scores were computed for each health center.

157 Patient volume was measured using the daily average number of patients managed by a health  
158 care provider in the outpatient department. It was calculated by dividing the total number of  
159 patients who visited the health center in the last six months before the study by the number of  
160 working days and then by the number of consultation rooms in each health center. An interaction  
161 term was created between patient volume and job satisfaction, in which job satisfaction was  
162 assumed to moderate the effect between patient volume and PQOC. The interaction effect was  
163 tested by plotting the marginal effects of interaction terms. The two variables were centered to  
164 the grand mean to facilitate the interpretation of coefficients.

### 165 **Sample size and sampling procedure**

166 The sample size was calculated using MedCalc sample size calculator software version 20.  
167 Sample size was calculated using a mean difference between two independent groups. The  
168 means and standard deviations (SD) of the outcome for the two comparison groups of insured  
169 and uninsured households were taken from a previous similar study conducted in Burkina Faso.<sup>32</sup>  
170 Mean scores of 5.2 and 5.4 with SD of 0.8 and 0.7 were reported on patient experience among  
171 insured and uninsured respondents, respectively, on a six-point response format Likert scale.  
172 Using a mean difference of 0.20, 80% power, 95% confidence level and equally sized groups, a  
173 total sample size of 446 was calculated. Considering a design effect of 1.5 attributable to the use  
174 of multi-stage sampling and a potential non-response rate of 10%, the effective sample size was  
175 estimated to be 736 households. Alternative sample sizes were calculated for each objective of a



176 PhD study on the sustainability of CBHI, with 1257 being the largest estimated sample size.  
177 Among those, 1081 eligible households participated in this study.  
178 The study participants were recruited using a three-level multistage sampling method. First, 12  
179 clusters of *kebeles* organized under a health center catchment area were selected. Then, 14 rural  
180 *kebeles* were drawn randomly using a lottery method proportional to the number of *kebeles* under  
181 each cluster. Accordingly, five *kebeles* from Tehulederie and nine from Kalu were included. A  
182 list of households who have ever been enrolled in the CBHI was obtained from the membership  
183 registration books of each *kebele* and these lists were used as the sampling frame. Then, the  
184 required sample was drawn randomly using a random number generator software from each  
185 *kebele* proportional to the total number of households ever enrolled in the scheme.

## 186 **Data collection**

187 An interviewer-administered questionnaire was used to collect data Household-level data were  
188 collected from 04 February to 21 March 2021 using a structured interviewer-administered  
189 questionnaire via an electronic data collection platform using the Open Data Kit (ODK)  
190 application. Individual-level data were collected at the household level in the community. The  
191 heads of the households were interviewed at their home or workplace by using the local  
192 language, Amharic. The data collectors submitted the completed forms to the ODK aggregator  
193 (Kobo) server daily, which helped us to review the daily submissions and facilitate the  
194 supervision process. Before the data collection, the questionnaire was pre-tested on a sample of  
195 84 randomly selected participants in one kebele. As part of the pre-test, a cognitive interview  
196 was conducted on selected items using the verbal probe technique among eight respondents to  
197 determine whether or not items and response categories were understood, and interpreted by the

198 potential respondents as intended. Accordingly, the wording of some items and response options  
199 were modified, and some items were removed.

200 Cluster-level data were collected from 12 health centers that provide health care for the  
201 population in the sampled *kebeles*. Patient volume data were obtained by reviewing the health  
202 centers' monthly service delivery reports while data related to work experience, affective  
203 commitment and job satisfaction were collected through a self-administered questionnaire among  
204 health care providers who worked more than one year in the current facility. Health center data  
205 were linked to household-level data based on the usual source of health care for each study  
206 participant.

## 207 **Data analysis**

208 The data were analyzed using Stata version 17.0. Exploratory factor analysis was performed to  
209 assess the validity of the quality measurement scale. Bartlett's test of Sphericity and the Kaiser-  
210 Mayer-Olkin's (KMO) measure of sampling adequacy were performed to assess the  
211 appropriateness of the data for factor analysis. The principal component factor method of  
212 extraction and Promax rotation with Kaiser Normalization was used. The Eigenvalue greater  
213 than one decision rule was used to determine the appropriate number of factors to be extracted.  
214 Items with loadings below 0.40 were removed from the analysis.<sup>37</sup> Correlation coefficients were  
215 used to test construct validity. Item-total score correlation, dimension-total score correlation and  
216 dimension intercorrelation were computed. The total score was the mean score of the ratings for  
217 all of the scale's items and the dimension score was the factor scores. A questionnaire has good  
218 construct validity when the item-total score correlations are higher than 0.40, dimension  
219 intercorrelations are less than 0.80 and dimension-total score correlations are higher than  
220 dimension intercorrelations.<sup>30</sup> Cronbach's alpha coefficients were generated for each dimension

221 to assess the internal consistency. Reliability of the scale was considered acceptable if  
222 Cronbach's alpha coefficient was 0.60 or higher.<sup>37</sup>

223 To compare mean scores of overall PQOC and its dimensions among subgroups, an independent  
224 t-test and one-way analysis of variance (ANOVA) with Tukey's post-hoc test were used. The  
225 relationship between the PQOC and its predictors was assessed using Multilevel linear regression  
226 model. The PQOC was assumed to be influenced by the characteristics of households as well as  
227 health center level factors. The characteristics of the household and household heads were taken  
228 as individual-level variables, whereas the characteristics of health care providers were considered  
229 as health center-level variables. Considering the hierarchical structure of the data, where patients  
230 are nested within health centers, a two-level multiple linear regression model was applied. Four  
231 models were fitted to determine the model that best fits the data: Model I or the null model (a  
232 model without predictors), Model II (only individual-level variables; Model III (only health  
233 center-level variables); and Model IV (both individual and health center-level variables).

234 The measures of association (fixed-effects) estimate the association between overall PQOC and  
235 various explanatory variables. The existence of a statistically significant association was  
236 determined at p-values of <0.05. The degree of the association was assessed using regression  
237 coefficients and their statistical significance was determined at a 95% confidence interval.

238 Intra-cluster correlation (ICC) and Proportional Change in Variance (PCV) were used to report  
239 the measures of variation (random effects). The need for multilevel analysis which considers  
240 health center-level factors was tested using the ICC. The ICC shows the variation in PQOC  
241 accounted for health center level characteristics. Statistically significant variability between  
242 health centers justifies the need to consider health center level factors.<sup>38</sup> The ICC was calculated  
243 as:

$$ICC = \sigma_b^2 / (\sigma_b^2 + \sigma_w^2)$$

244 Where  $\sigma_b^2$  and  $\sigma_w^2$  are the between and within health center variances.<sup>39</sup>

245 The PCV expresses the change in the health center level variance between the empty model and  
246 models with more terms and was calculated by  $PCV = V_A - V_B/V_A$ , where  $V_A$  = variance of the  
247 null model, and  $V_B$  = variance of the model with more terms. It measures the total variation  
248 explained by individual and health center level factors. Models were compared using the  
249 Deviance Information Criteria (DIC) and Akaike Information Criteria (AIC). The model with the  
250 lowest DIC and AIC values was deemed to be the best fit model.

251 The preliminary analysis confirmed no violation of the assumptions of normality, linearity,  
252 homoscedasticity and multicollinearity. The presence of multicollinearity was determined using  
253 Variance Inflation Factor with a cutoff point of 5. We used the Durbin–Wu–Hausman test to  
254 look for endogeneity between current insurance status and PQOC.

## 255 **RESULTS**

### 256 **Background characteristics of the study population**

257 The household survey included 1081 respondents who had visited a health center at least once in  
258 the previous 12 months prior to the study. The average age of the study participants was 49.25  
259 years (SD=12.07), with slightly more than half (51.34%) being between the ages of 45 and 64,  
260 and 12.67% being 65 and older. Of the total household heads, 938 (86.77%) were men, and 1003  
261 (92.78%) were currently married. One-fifth of the study participants (20.91%) attended formal  
262 education, and 62.72% had a household size of five or above.

263 Nearly ninety percent of the households (87.14%) were active members of the CBHI scheme at  
264 the time of the study. A quarter of households (25.72%) had one or more individuals with a

265 known chronic illness informed by a healthcare provider. One-third of respondents (33.58) rated  
266 their household health status as very good, while 207 (19.15%) and 511 (47.27) of them rated it  
267 as fair and good respectively. Nearly half of the households (46.16%) had visited a health center  
268 within three months prior to the study, while 31.73% and 22.11% had their most recent visit to a  
269 health center before 6-12 and 3-6 months, respectively (Table 1).

270 The median work experience of health care providers involved in this study ranges from three to  
271 ten years. The mean scores of affective commitment and job satisfaction were 29.00 and 30.95  
272 (SD=2.08 and 3.17) respectively. The average patient volume was 32.17 per day per care  
273 provider with a range of 19 to 43 (SD=7.83).

## 274 **Factor analysis**

275 Sampling was adequate as measured by the KMO (0.83) and Bartlett's test of sphericity was  
276 significant ( $p < 0.001$ ). Two items were removed from further analysis due to loadings below  
277 0.40, and one item was removed due to low communality. The factor analysis extracted five  
278 dimensions that explained 59.25% of the total variation (online supplemental file 1). The item-  
279 total score correlations ranged from 0.268 to 0.622, four items had correlations less than 0.40.  
280 The dimension intercorrelations varied from 0.031 to 0.434, all of which were less than the 0.80  
281 criterion, indicating that each dimension was distinct enough to be considered an independent  
282 measure. Dimension-total score correlation range between 0.463 to 0.743, all significant at a p-  
283 value of .001, and were higher than dimension intercorrelation. The scale was tested for  
284 reliability and had an overall Cronbach's alpha coefficient of 0.804. The Cronbach's alpha  
285 coefficients for the five dimensions exceeded 0.60, except for access to care subscale, which had  
286 an alpha coefficient of 0.531.

287

288 Table 1: Basic characteristics of respondents in health centers affiliated with a CBHI in two districts of  
 289 Northeastern Ethiopia, 2021.

| Variable                             | Categories        | N=1081 | %     |
|--------------------------------------|-------------------|--------|-------|
| Age in years                         | 25 – 44           | 389    | 35.99 |
|                                      | 45 – 64           | 555    | 51.34 |
|                                      | 65+               | 137    | 12.67 |
| Gender                               | Men               | 938    | 86.77 |
|                                      | Women             | 143    | 13.23 |
| Marital status                       | Divorced or widow | 78     | 7.22  |
|                                      | Married           | 1003   | 92.78 |
| Attend formal education              | No                | 855    | 79.09 |
|                                      | Yes               | 226    | 20.91 |
| Household size                       | < Five            | 403    | 37.28 |
|                                      | ≥ Five            | 678    | 62.72 |
| Wealth tertile                       | Lowest            | 361    | 33.40 |
|                                      | Medium            | 360    | 33.30 |
|                                      | Highest           | 360    | 33.30 |
| Current insurance status             | Ex-member         | 139    | 12.86 |
|                                      | Active-member     | 942    | 87.14 |
| Perceived health status              | Fair              | 207    | 19.15 |
|                                      | Good              | 511    | 47.27 |
|                                      | Very good         | 363    | 33.58 |
| Chronic illness                      | No                | 803    | 74.28 |
|                                      | Yes               | 278    | 25.72 |
| Most recent visit to a health center | < 3 months        | 499    | 46.16 |
|                                      | 3-6 months        | 239    | 22.11 |
|                                      | 6-12 months       | 343    | 31.73 |

290 **Perceived quality of care**

291 The minimum maximum and mean PQOC scores were 22.06 and 97.06 respectively. The mean  
 292 score was 62.85 (95% CI: 62.22, 63.47) with an SD of 10.49. The aggregated mean score at the

293 health center level ranges from 56.18 to 67.58. Patient-provider communication had the highest  
294 mean score (M=72.29, SD=12.66) of the five quality dimensions, while information provision  
295 had the lowest score (M=55.83, SD=17.34). The mean score of each measurement item is  
296 summarized by online supplemental file 2.

297 A two-sample t-test and one-way ANOVA test were performed to compare differences in overall  
298 PQOC and its dimensions scores between subgroups. As shown under table 2, for example,  
299 there was a significant difference in the total score of PQOC for wealth tertile at the  $p<0.05$  level  
300 (F=8.83,  $p=0.001$ ). A significant difference was also observed between wealth tertile in terms of  
301 mean score of patient-provider communication (F=8.21,  $p<0.001$ ), information provision  
302 (F=50.06,  $p<0.001$ ), and trust in care providers dimensions (F=4.13,  $p=0.016$ ). Tukey's post-hoc  
303 test indicated that the mean score of the overall PQOC for the low wealth tertile (M=64.71,  
304 SD=11.43) was significantly different from both the medium (M=61.70, SD=10.21) and high  
305 (M=62.12, SD=9.52) wealth tertile. However, no significant difference was seen between  
306 medium and high wealth tertile.

307 The overall mean PQOC score was significantly different among health centers (F=11.85,  
308  $p<.001$ ). The mean scores for all the five dimensions were also significantly different among  
309 health centers  $p<0.001$  level: technical care (F=8.66), patient-provider communication (F=6.65),  
310 information provision (F=47.42), access to care (F=36.87) and trust in care providers (F=6.98).  
311 The mean scores of the five quality dimensions across groups from each health center are  
312 depicted by a radar chart (Figure 1). The chart shows a comparison of the mean scores on a scale  
313 of 10 to 80. For example, respondents from 11 health centers had a higher perception score on  
314 patient-provider communication than other dimensions with lesser variation, while the  
315 information provision dimension was mostly ranked low with significant variability.

316 Table 2: t-test and ANOVA comparing mean scores of PQOC across respondent characteristics in health  
 317 centers affiliated with CBHI in two districts of Northeastern Ethiopia, 2021.

| Variable                                    | Categories       | N    | Technical care     |       |                    | Communication      |       |                    | Information provision |       |                    |
|---------------------------------------------|------------------|------|--------------------|-------|--------------------|--------------------|-------|--------------------|-----------------------|-------|--------------------|
|                                             |                  |      | M                  | SD    | t/F                | M                  | SD    | t/F                | M                     | SD    | t/F                |
| <b>Age in years</b>                         | 25 – 44          | 389  | 60.41              | 19.51 | 0.24               | 72.00              | 12.36 | 1.10               | 53.44 <sup>b</sup>    | 17.16 | 15.69 <sup>#</sup> |
|                                             | 45 – 64          | 555  | 60.18              | 18.99 |                    | 72.13              | 12.51 |                    | 55.75 <sup>b</sup>    | 17.53 |                    |
|                                             | 65+              | 137  | 61.44              | 18.05 |                    | 73.78              | 13.99 |                    | 62.96                 | 15.11 |                    |
| <b>Gender</b>                               | Men              | 938  | 60.39              | 18.91 | -0.12              | 72.09              | 12.71 | -1.39              | 55.50                 | 17.25 | -1.60              |
|                                             | Women            | 143  | 60.61              | 20.01 |                    | 73.66              | 12.26 |                    | 58.00                 | 17.84 |                    |
| <b>Marital status</b>                       | Divorced/widowed | 78   | 63.46              | 18.43 | 1.46               | 73.50              | 15.12 | 0.88               | 63.46                 | 16.98 | 4.06 <sup>#</sup>  |
|                                             | Married          | 1003 | 60.19              | 19.09 |                    | 72.20              | 12.45 |                    | 55.24                 | 17.24 |                    |
| <b>Attend formal education</b>              | No               | 855  | 60.47              | 19.26 | 0.15               | 72.22              | 12.85 | -0.36              | 55.54                 | 17.47 | -1.08              |
|                                             | Yes              | 226  | 60.25              | 18.27 |                    | 72.57              | 11.92 |                    | 56.94                 | 16.82 |                    |
| <b>Household size</b>                       | < Five           | 403  | 61.37              | 19.02 | 1.27               | 73.14              | 12.59 | 1.69               | 56.42                 | 17.89 | 0.86               |
|                                             | ≥ Five           | 678  | 59.86              | 19.06 |                    | 71.79              | 12.68 |                    | 55.48                 | 17.01 |                    |
| <b>Wealth tertile</b>                       | Lowest           | 361  | 62.05              | 18.02 | 2.49               | 74.47              | 12.42 | 8.21 <sup>#</sup>  | 62.76 <sup>a</sup>    | 16.04 | 50.06 <sup>#</sup> |
|                                             | Medium           | 360  | 58.89              | 19.10 |                    | 71.00 <sup>b</sup> | 13.21 |                    | 53.85 <sup>a</sup>    | 18.00 |                    |
|                                             | Highest          | 360  | 60.32              | 19.91 |                    | 71.41 <sup>b</sup> | 12.06 |                    | 50.87 <sup>a</sup>    | 15.68 |                    |
| <b>Current insurance status</b>             | Ex-member        | 139  | 55.94              | 19.67 | -2.99 <sup>§</sup> | 67.77              | 16.13 | -4.46 <sup>§</sup> | 53.91                 | 18.08 | -1.40              |
|                                             | Active-member    | 942  | 61.08              | 18.88 |                    | 72.95              | 11.93 |                    | 56.12                 | 17.22 |                    |
| <b>Self-rated health</b>                    | Fair             | 207  | 64.69 <sup>b</sup> | 17.16 | 11.24 <sup>#</sup> | 75.44              | 11.93 | 9.66 <sup>#</sup>  | 62.53                 | 16.09 | 20.50 <sup>#</sup> |
|                                             | Good             | 511  | 61.06 <sup>b</sup> | 18.41 |                    | 70.91 <sup>b</sup> | 12.58 |                    | 54.83 <sup>b</sup>    | 17.44 |                    |
|                                             | Very good        | 363  | 57.09              | 20.39 |                    | 72.45 <sup>b</sup> | 12.87 |                    | 53.43 <sup>b</sup>    | 16.99 |                    |
| <b>Chronic illness</b>                      | No               | 803  | 59.24              | 19.47 | -3.50 <sup>#</sup> | 71.63              | 12.94 | -2.96 <sup>§</sup> | 53.87                 | 17.18 | -6.45 <sup>#</sup> |
|                                             | Yes              | 278  | 63.85              | 17.38 |                    | 74.22              | 11.61 |                    | 61.51                 | 16.58 |                    |
| <b>Most recent visit to a health center</b> | < 3 months       | 499  | 60.10              | 18.87 | 1.29               | 73.08              | 12.81 | 2.09               | 60.08                 | 17.43 | 31.01 <sup>#</sup> |
|                                             | 3-6 months       | 239  | 62.13              | 18.49 |                    | 72.11              | 12.46 |                    | 53.71 <sup>b</sup>    | 16.12 |                    |
|                                             | 6-12 months      | 343  | 59.69              | 19.68 |                    | 71.28              | 12.53 |                    | 51.13 <sup>b</sup>    | 16.57 |                    |
| <b>Total</b>                                |                  | 1081 | 60.42              | 19.05 |                    | 72.29              | 12.66 |                    | 55.83                 | 17.34 |                    |
| <b>Variable</b>                             | Categories       | N    | Access to care     |       |                    | Trust in providers |       |                    | Overall PQOC          |       |                    |



|                                             |                  |      | M                  | SD    | t/F                | M                  | SD    | t/F                | M                  | SD    | t/F                |
|---------------------------------------------|------------------|------|--------------------|-------|--------------------|--------------------|-------|--------------------|--------------------|-------|--------------------|
| <b>Age in years</b>                         | 25 – 44          | 389  | 62.48              | 14.55 | 1.12               | 66.99 <sup>b</sup> | 12.64 | 4.89 <sup>§</sup>  | 62.46              | 9.72  | 1.08               |
|                                             | 45 – 64          | 555  | 61.77              | 15.05 |                    | 67.01 <sup>b</sup> | 13.69 |                    | 62.83              | 10.66 |                    |
|                                             | 65+              | 137  | 60.31              | 13.72 |                    | 63.08              | 16.51 |                    | 64.00              | 11.86 |                    |
| <b>Gender</b>                               | Men              | 938  | 61.68              | 14.58 | -0.92              | 66.47              | 13.50 | -0.21              | 62.68              | 10.26 | -1.31              |
|                                             | Women            | 143  | 62.89              | 15.53 |                    | 66.72              | 15.46 |                    | 63.91              | 11.89 |                    |
| <b>Marital status</b>                       | Divorced/widowed | 78   | 58.97              | 16.29 | -1.79              | 65.38              | 17.52 | -0.75              | 64.52              | 13.69 | 1.46               |
|                                             | Married          | 1003 | 62.06              | 14.56 |                    | 66.59              | 13.44 |                    | 62.72              | 10.20 |                    |
| <b>Attend formal education</b>              | No               | 855  | 62.03              | 14.55 | 0.83               | 66.73              | 13.91 | 1.07               | 62.86              | 10.61 | 0.07               |
|                                             | Yes              | 226  | 61.12              | 15.30 |                    | 65.63              | 13.20 |                    | 62.80              | 10.07 |                    |
| <b>Household size</b>                       | < Five           | 403  | 62.97              | 14.06 | 1.94               | 66.48              | 14.92 | -0.04              | 63.56              | 10.79 | 1.73               |
|                                             | ≥ Five           | 678  | 61.17              | 15.05 |                    | 66.52              | 13.05 |                    | 62.42              | 10.30 |                    |
| <b>Wealth tertile</b>                       | Lowest           | 361  | 60.99              | 14.36 | 2.62               | 65.17 <sup>a</sup> | 16.34 | 4.13 <sup>†</sup>  | 64.71              | 11.43 | 8.83 <sup>#</sup>  |
|                                             | Medium           | 360  | 61.25              | 14.77 |                    | 66.27              | 13.06 |                    | 61.70 <sup>b</sup> | 10.21 |                    |
|                                             | Highest          | 360  | 63.28              | 14.93 |                    | 68.08 <sup>a</sup> | 11.30 |                    | 62.12 <sup>b</sup> | 9.52  |                    |
| <b>Current insurance status</b>             | Ex-member        | 139  | 58.81              | 16.96 | -2.61 <sup>§</sup> | 63.49              | 16.34 | -2.77 <sup>§</sup> | 59.57              | 12.06 | -3.96 <sup>#</sup> |
|                                             | Active-member    | 942  | 62.29              | 14.30 |                    | 66.95              | 13.30 |                    | 63.33              | 10.16 |                    |
| <b>Self-rated health</b>                    | Fair             | 207  | 60.78              | 14.39 | 1.76               | 65.74              | 14.79 | 3.71 <sup>†</sup>  | 65.35              | 11.05 | 8.04 <sup>#</sup>  |
|                                             | Good             | 511  | 61.47              | 13.92 |                    | 67.69 <sup>a</sup> | 12.29 |                    | 62.60 <sup>b</sup> | 9.79  |                    |
|                                             | Very good        | 363  | 62.96              | 15.89 |                    | 65.27 <sup>a</sup> | 14.99 |                    | 61.77 <sup>b</sup> | 10.91 |                    |
| <b>Chronic illness</b>                      | No               | 803  | 61.41              | 14.88 | -1.64              | 66.33              | 13.67 | -0.69              | 61.92              | 10.36 | -4.96 <sup>#</sup> |
|                                             | Yes              | 278  | 63.08              | 14.16 |                    | 66.70              | 14.06 |                    | 65.51              | 10.42 |                    |
| <b>Most recent visit to a health center</b> | < 3 months       | 499  | 61.10 <sup>b</sup> | 14.36 | 5.41 <sup>§</sup>  | 64.71              | 15.25 | 8.63 <sup>#</sup>  | 63.44 <sup>b</sup> | 11.24 | 4.78 <sup>§</sup>  |
|                                             | 3-6 months       | 239  | 64.59              | 14.10 |                    | 68.83 <sup>b</sup> | 11.63 |                    | 63.67 <sup>b</sup> | 9.49  |                    |
|                                             | 6-12 months      | 343  | 61.01 <sup>b</sup> | 15.42 |                    | 67.49 <sup>b</sup> | 12.51 |                    | 61.41              | 9.90  |                    |
| <b>Total</b>                                |                  | 1081 | 61.84              | 14.71 |                    | 66.50              | 13.77 |                    | 62.85              | 10.49 |                    |

318 <sup>†</sup>p<0.05; <sup>§</sup>p<0.01; <sup>#</sup>p<0.001; t/F – t-test/F-test statistics; Based on Tukey's post-hoc test, means sharing letter 'a' are  
 319 significantly different; while means sharing letter 'b' are not significantly different in the group at the 5% level.

320 Figure 1: Dimensions of PQOC across health centers affiliated with CBHI in two districts of  
 321 Northeastern Ethiopia, 2021.

## 322 **Predictors of perceived quality of care: Multilevel analysis**

323 The fixed effects (measures of association) and the Random effects (measures of variation) for  
324 the multilevel linear regression model are depicted in Table 3. The results of the null model  
325 showed that 7.80% of the total variance in PQOC was attributed to health center level variables  
326 (ICC=0.078). The variability between health centers was statistically significant ( $\tau=8.38$ ,  
327  $p<0.001$ ). Furthermore, the null model shows a significant improvement in fit relative to a  
328 standard linear model, demonstrating the importance of developing a multilevel model. The  
329 health center level variation in Model II remained significant ( $\tau=8.77$ ,  $p<0.001$ ), with 8.44% of  
330 the total variability being attributed to differences across health centers. The PCV is negative in  
331 this model, indicating that household-level characteristics did not play a role in explaining the  
332 between health center variation. In Model III, the PCV demonstrated that cluster-level variables  
333 explained nearly all of the variation between health centers, indicating the importance of  
334 including health center-level characteristics to build a more robust explanatory model. The  
335 model with the lowest DIC and AIC (Model IV) was selected to describe, and interpret the  
336 results of the regression analysis.

337 After adjusting for other individual and health center level factors, the PQOC for households  
338 with higher wealth tertile increased by 2.24 points compared to those with lower wealth tertile  
339 ( $b=2.24$ ; 95% CI: 0.48, 4.00). Households that were active members of CBHI at the time of the  
340 study had a 3.37-point higher overall PQOC score than ex-members ( $b=3.37$ ; 95% CI: 1.58,  
341 5.16).

342 The PQOC score of households who rated their health status as very good was 2.25 points lower  
343 compared to those who rated it as fair ( $b=-2.25$ ; 95% CI: -4.12, -0.38). The PQOC score of  
344 households who had one or more family members with chronic illness was 1.78 points higher

345 compared to those with no chronic illness (b=1.78; 95% CI: 0.29, 3.27). Time since the most  
346 recent visit to a health center was also significantly associated with PQOC. The PQOC score for  
347 households who had their most recent visit to a health center before 3-6 months was 2.36 points  
348 higher compared to those whose recent visit was within 3-months prior to the study (b=2.36;  
349 95% CI: 0.78, 3.94).

350 Regarding health center level variables, the work experience of health care providers and patient  
351 volume had statistically significant associations with PQOC. A 1.34-point improvement in the  
352 average PQOC of health centers was noted for every year increase in the median work  
353 experience of health care providers (b=1.34; 95% CI: 0.93, 1.75). At an average staff job  
354 satisfaction, a 0.52-point drop in the average PQOC of health centers was observed for a unit  
355 increase in patient volume (b=-0.52; 95% CI: -0.63, -0.41).

## 356 **DISCUSSIONS**

357 In this study, the patient-provider communication received the highest score among the five  
358 quality dimensions. In 2015, the Ethiopian government incorporated the development of caring,  
359 respectful and compassionate health care providers as one of the main transformations agendas  
360 in its five-year strategic plan.<sup>27</sup> Our finding may be partly attributed to the government's ongoing  
361 training initiative aimed at producing caring, respectful and compassionate health care providers.  
362 The perception score for the information provision dimension, on the other hand, was the lowest.  
363 This could be attributed to an increase in patient volume as a result of the implementation of  
364 CBHI.<sup>26</sup> Items loaded under this dimension appear to be less practical in the presence of a larger  
365 patient load. If health care providers are required to treat a greater number of patients,  
366 consultation times will be reduced. They are unlikely to provide the necessary information to  
367 their clients if they are under time constraints.

368

369 Table 3: Multilevel Linear regression analysis on factors associated with PQOC in health centers affiliated  
 370 with CBHI in two districts of Northeastern Ethiopia, 2021.

| Variables                            |                  | Model I    | Model II                          | Model III                      | Model IV                          |
|--------------------------------------|------------------|------------|-----------------------------------|--------------------------------|-----------------------------------|
| Category                             |                  | b (95% CI) |                                   | b (95% CI)                     | b (95% CI)                        |
| <b>Fixed effects</b>                 |                  |            |                                   |                                |                                   |
| Age                                  |                  |            | -0.02 (-0.07, 0.04)               |                                | -0.03 (-0.09, 0.02)               |
| Gender                               | Men              |            | ref.                              |                                | ref.                              |
|                                      | Women            |            | 0.79 (-1.31, 2.91)                |                                | 1.01 (-1.09, 3.10)                |
| Marital status                       | Divorced/Widowed |            | ref.                              |                                | ref.                              |
|                                      | Married          |            | -0.18 (-3.02, 2.66)               |                                | 0.22 (-2.59, 3.03)                |
| Attend modern education              | No               |            | ref.                              |                                | ref.                              |
|                                      | Yes              |            | -0.08 (-1.65, 1.49)               |                                | -0.31 (-1.85, 1.24)               |
| Wealth tertile                       | Low              |            | ref.                              |                                | ref.                              |
|                                      | Medium           |            | -0.75 (-2.38, 0.89)               |                                | -0.20 (-1.74, 1.35)               |
|                                      | High             |            | 0.86 (-1.13, 2.84)                |                                | 2.24 (0.48, 4.00) <sup>*</sup>    |
| Household size                       | Small (< 5)      |            | ref.                              |                                | ref.                              |
|                                      | Large (≥ 5)      |            | -0.35 (-1.59, 0.89)               |                                | -0.39 (-1.62, 0.84)               |
| Current insurance status             | Ex-member        |            | ref.                              |                                | ref.                              |
|                                      | Active member    |            | 3.31 (1.51, 5.12) <sup>#</sup>    |                                | 3.37 (1.58, 5.16) <sup>#</sup>    |
| Perceived health status              | Fair             |            | ref.                              |                                |                                   |
|                                      | Good             |            | -0.94 (-2.69, 0.82)               |                                | -0.92 (-2.66, 0.83)               |
|                                      | Very good        |            | -2.22 (-4.10, -0.38) <sup>*</sup> |                                | -2.25 (-4.12, -0.38) <sup>*</sup> |
| Chronic illness                      | No               |            | ref.                              |                                | ref.                              |
|                                      | Yes              |            | 1.95 (0.44, 3.45) <sup>*</sup>    |                                | 1.78 (0.29, 3.27) <sup>*</sup>    |
| Most recent visit to a health center | < 3 months       |            | ref.                              |                                | ref.                              |
|                                      | 3-6 months       |            | 2.04 (0.46, 3.65) <sup>*</sup>    |                                | 2.36 (0.78, 3.94) <sup>§</sup>    |
|                                      | 6-12 months      |            | 0.94 (-0.57, 2.46)                |                                | 1.27 (-0.21, 2.75)                |
| Work experience                      |                  |            |                                   | 0.94 (0.60, 1.28) <sup>#</sup> | 1.34 (0.93, 1.75) <sup>#</sup>    |
| Affective commitment                 |                  |            |                                   | 0.61 (0.15, 1.06) <sup>§</sup> | 0.34 (-0.12, 0.81)                |

|                                   |                          |                          |                                   |                                   |
|-----------------------------------|--------------------------|--------------------------|-----------------------------------|-----------------------------------|
| Patient volume                    |                          |                          | -0.42 (-0.51, -0.33) <sup>#</sup> | -0.52 (-0.63, -0.41) <sup>#</sup> |
| Job satisfaction                  |                          |                          | 0.06 (-0.15, 0.27)                | 0.09 (-0.12, 0.30)                |
| Patient volume x Job satisfaction |                          |                          | 0.08 (0.04, 0.12) <sup>#</sup>    | 0.06 (0.02, 0.10) <sup>§</sup>    |
| <b>Random effect</b>              |                          |                          |                                   |                                   |
| $\tau$ (SE)                       | 8.38 (3.81) <sup>#</sup> | 8.77 (4.16) <sup>#</sup> | $\approx 0$                       | $\approx 0$                       |
| ICC (%)                           | 7.80                     | 8.44                     | $\approx 0.00$                    | $\approx 0.00$                    |
| PCV (%)                           | Reference                | -4.65                    | $\approx 100$                     | $\approx 100$                     |
| <b>Model fitness</b>              |                          |                          |                                   |                                   |
| DIC                               | 8061.75                  | 8018.83                  | 8037.26                           | 7984.46                           |
| AIC                               | 8067.75                  | 8050.83                  | 8051.26                           | 8026.46                           |

371 \*  $p < 0.05$ ;  $^{\S} p < 0.01$ ;  $^{\#} p < 0.001$ ; ref. - reference group;  $\tau$  - Cluster level variance, ICC - Intraclass Correlation; PCV -  
 372 Proportional Change in Variance; DIC - Deviance Information Criterion; AIC - Akaike Information Criterion; SE -  
 373 standard error; b - regression coefficient; CI - Confidence Interval.

374 In terms of item level observations, waiting time and medicine availability received the lowest  
 375 perception scores (53.70 and 54.37 respectively), which could be also related to increased patient  
 376 load. This is consistent with previous studies in Ethiopia, which showed that CBHI insured  
 377 clients frequently complain about a lack of medicine and long wait times at CBHI affiliated  
 378 health facilities.<sup>40 41</sup>

379 Results of the regression analysis revealed that households with higher wealth tertile had a higher  
 380 PQOC score than those with lower wealth tertile. This is in contrast to other studies,<sup>15 42</sup> whereby  
 381 the richest group had a lower perception score. This discrepancy could be attributed to the use of  
 382 different metrics to assess the quality of care. People with higher economic status may be more  
 383 aware of health issues and may be able to bargain with health care providers to obtain the best  
 384 possible care. Furthermore, if prescribed medicines are not available in CBHI affiliated health  
 385 facilities (which is one of the lowest-rated items in this study), they can afford to buy from

386 private pharmacies. On the contrary, it may be irritating for people with lower economic status to  
387 buy medicines with limited money at hand or to forgo treatment due to lack of money. In this  
388 regard, they may develop a negative perception of the quality of care.

389 Households who were active members of the community health insurance at the time of the  
390 study had a higher rating of PQOC compared to ex-members. Contrary to our finding, a study in  
391 Ghana showed that previously insured clients had a higher perception of quality of care  
392 compared to actively insured clients (statistical significance not reported). The authors argued  
393 that this was due to the more time-consuming nature of the service delivery processes for insured  
394 clients.<sup>43</sup>

395 At least three possible explanations exist for the relationship between CBHI status and quality of  
396 care. First, because they do not have to pay for health care, active members have better access to  
397 and enjoy its benefits, resulting in a favorable perception of its quality. Second, the relationship  
398 could be due to an endogeneity issue. It is plausible that higher quality reported by active  
399 members is due to their desire to stay in the scheme, which could be influenced by unobserved  
400 variables. We tested for endogeneity between current insurance status and PQOC using the  
401 Durbin–Wu–Hausman test, and the results showed no evidence of endogeneity. However, there  
402 is still the possibility of endogeneity due to omitted variables. Third, ex-members of CBHI may  
403 have had negative experiences with health services, which led to the decision to discontinue their  
404 membership. As a result, they would be critical in rating the quality of care provided. In support  
405 of the latter argument, it was evidenced that poor quality of care was a major reason why  
406 insurance members leave the scheme.<sup>24 44</sup> A statistically significant association was also reported  
407 between dropout and low quality of care.<sup>44-46</sup>

408 This study verified that the PQOC score of households who rated their health status as very good  
409 was significantly lower compared to those who rated it as fair. The households' chronic illness  
410 experiences also influence the PQOC rating. The PQOC score of households that had one or  
411 more family members with chronic illness was higher compared to those with no chronic illness.  
412 This may be true for people who perceive their health as poor or who live with chronic  
413 conditions to appreciate the gains or benefits of the health care they receive. In this respect, they  
414 may be more likely than their counterparts to rate the quality of care higher.

415 The results also indicated that households who had their most recent visit to a health center  
416 before 3-6 months had higher PQOC scores compared to those whose recent visit was within 3-  
417 months prior to the study. Patients may be experiencing varying levels of emotional highs and  
418 lows depending on the length of the most recent facility visit. Although patients' perceptions of  
419 quality may develop over time,<sup>5</sup> patients who have recently visited a health facility may be more  
420 critical of the quality of care due to strong emotions attached with negative events or health  
421 services that fall short of their expectations.

422 Our findings revealed that the work experience of health care providers was positively associated  
423 with PQOC. Work experience is linked to increased process flow, service integration and task  
424 specialization. Specialization can lead to a faster work pace, more output in less time, and higher  
425 quality.<sup>47</sup> This could be more pronounced in Ethiopia, where the number of outpatient visits to  
426 CBHI affiliated health centers had increased dramatically.<sup>26</sup> Providers with more experience take  
427 less time to make diagnosis and treatment decisions while still providing recommended practical  
428 aspects of care such as good communication, physical examination, and provision of relevant  
429 health information.<sup>47</sup> As a result, they can reduce waiting times and their management outcomes  
430 may be more effective than inexperienced providers.

431 Conditional on the average staff job satisfaction, patient volume has a negative association with  
432 PQOC. A study in Ethiopia identified a non-linear significant association (an inverted U-shape)  
433 between patient volume and quality. Quality decreased with increasing patient volume in health  
434 facilities that treated 90.6 or more patients per day, while quality increased with increasing  
435 patient volume in health facilities that treated less than 90.6 patients per day in the outpatient  
436 departments.<sup>48</sup> Our finding is consistent with a study at public hospitals in China,<sup>29</sup> where  
437 overcrowding was negatively associated clients' perception of quality of care. There are two  
438 possible explanations for the observed relationship between patient volume and PQOC. First, the  
439 increased patient volume would put a great deal of pressure on health care providers to treat a  
440 large number of patients in a short time. This may result in a shorter consultation time and the  
441 omission of important practical aspects of care. Second, an increase in patient volume would  
442 mean longer waiting times at various service delivery points. Both of these factors could have  
443 contributed to a negative patient experience and influenced their perception on the overall quality  
444 of care.

445 Some studies reported a positive relationship between patient volume and quality of basic  
446 maternal care, and postoperative infections.<sup>49 50</sup> The alternative direction of this relationship, in  
447 which quality drives patient volume, is based on the assumption that the provision of high-  
448 quality care will attract more patients. This may be true in areas where patients have access to a  
449 variety of competitive health care facilities and health care providers are incentivized for  
450 providing higher-quality care. This is not the case in low-income countries, like Ethiopia, where  
451 health care facilities are hard to reach for most of the rural population. Members of CBHI are  
452 further limited to use health services only in public health facilities that are affiliated with the  
453 scheme.



454 This study found no relationship between staff job satisfaction and the quality of care. This  
455 contrasts with the findings of Kvist et al,<sup>51</sup> which reported a positive relationship between job  
456 satisfaction amongst nursing staff and patients' perceptions of quality of care. Despite this, it  
457 moderates the relationship between patient volume and quality of care. An interaction term  
458 between patient volume and job satisfaction was found to be positively associated with PQOC,  
459 implying that increasing staff job satisfaction would buffer or lessen the effect between patient  
460 volume and PQOC. At average job satisfaction, a one-unit increase in patient volume is  
461 associated with a 52% decrease in the average PQOC of health centers. If job satisfaction is set  
462 one SD above the mean, a one-unit increase in patient volume would result in a 33% decrease in  
463 PQOC. This prediction is substantiated by the fact that the margins graph for patient volume  
464 showed the flattest slope for high job satisfaction.

465 The findings of this study will be an essential input for quality improvement initiatives as well as  
466 addressing challenges in the country's effort to establish higher-level insurance pools. This is the  
467 first study of its kind to consider variables at the health center level that are associated with  
468 perceived quality of care in Ethiopia. It gives an important lesson for health care managers and  
469 other relevant stakeholders to consider health center level characteristics in healthcare quality  
470 improvement efforts. It also pointed out quality dimensions that require special consideration in  
471 managerial decisions. Despite the significant findings of the current study, some caution should  
472 be taken in interpreting the findings. One noteworthy limitation of this study is the cross-  
473 sectional nature of the data, which makes inferring causation between current insurance status  
474 and PQOC difficult due to possibility of endogeneity.

## 475 **CONCLUSIONS**

476 Despite encouraging findings on patient-provider communication, much work remains to be  
477 done to improve information provision and access to care quality dimensions. According to the  
478 findings, people's perceptions of quality of care varied depending on a variety of individual and  
479 health center level factors. The household's wealth status, current insurance membership,  
480 perceived health status, presence of chronic illness in the household and time since the most  
481 recent visit to a health center were individual-level predictors of PQOC. At the health center  
482 level, patient volume and work experience of health care providers were found to be associated  
483 with PQOC. Staff job satisfaction was an important factor that moderated the effect between  
484 patient volume and PQOC. A lower patient volume allows the health care provider to devote  
485 more time and attention to each patient, address their patients' individual needs, and have more  
486 time to improve communication with and provide behavior change counseling which has an  
487 impact on quality of care.<sup>52</sup> Therefore, to ensure that patients have access to a better quality of  
488 care, it is critical to determine an appropriate patient volume per care provider. It is also vital to  
489 devise mechanisms to improve staff job satisfaction, as this lessens the effect of increased patient  
490 volume on quality of care. More importantly, health centers should go to great lengths to ensure  
491 that every patient has access to the necessary medications. This will boost clients' trust in health  
492 care providers, which will be critical for health insurance schemes to retain and attract members.

493 **Acknowledgements** The authors would like to acknowledge the health offices of Tehulederie  
494 and Kalu districts, health extension workers, *kebele* leaders, data collectors, supervisors, and  
495 study participants.

## 496 **Contributors**

497 MH conceptualized the study, designed the study, collected the data, analyzed and interpreted the  
498 data, and drafted the manuscript. MA and NBB contributed to survey design data collection and  
499 statistical analysis and reviewed the manuscript. All authors read and approved the final  
500 manuscript.

501 **Funding** The authors have not declared a specific grant for this research from any funding  
502 agency in the public, commercial or not-for-profit sectors.

503 **Competing interests** None declared.

504 **Patient consent for publication** Not required.

505 **Ethics approval** Ethical approval was obtained from the Institutional Review Board (IRB) of  
506 College of Medicine and Health Science, Bahir Dar University with protocol number 001/2021.  
507 A support letter was communicated to the district health offices to gain entry permission into the  
508 community where the research was conducted. Before the interview, oral informed consent was  
509 secured from each of the study participants. Confidentiality was assured through collecting  
510 anonymous information and by informing the participants that personal identifiers will not be  
511 revealed to a third party.

512 **Provenance and peer review** Not commissioned; externally peer reviewed.

513 **Data availability statement** Data are available in a public, open access repository. The datasets  
514 generated and analyzed during the current study are available in the Dryad repository, at  
515 <https://doi.org/10.5061/dryad.ncjsxksw5>

516 **Open access** This is an open access article distributed in accordance with the Creative Commons  
517 Attribution Non-Commercial (CC BY- NC 4.0) license, which permits others to distribute,

518 remix, adapt, build upon this work non- commercially, and license their derivative works on  
519 different terms, provided the original work is properly cited, appropriate credit is given, any  
520 changes made indicated, and the use is non- commercial. See:  
521 <http://creativecommons.org/licenses/by-nc/4.0/> .

## 522 **ORCID iD**

523 Mohammed Hussien <https://orcid.org/0000-0002-5747-8967>

524 Muluken Azage <https://orcid.org/0000-0003-3222-0158>

525 Negalign Berhanu Bayou <https://orcid.org/0000-0002-0975-8358>

## 526 **REFERENCES**

- 527 1. Nash DB, Joshi MS, Ransom ER, et al. The healthcare quality book : vision, strategy, and  
528 tools. 4th ed. Washington, DC: *Health Administration Press* 2019.
- 529 2. WHO, OECD, and, et al. Delivering quality health services: a global imperative for universal  
530 health coverage. Geneva: World Health Organization, Organisation for Economic Co-  
531 operation and Development, and The World Bank, 2018.
- 532 3. Larson E, Sharma J, Bohren MA, et al. When the patient is the expert: measuring patient  
533 experience and satisfaction with care. *Bull World Health Organ* 2019;97(8):563-69. doi:  
534 10.2471/BLT.18.225201 [published Online First: 2019/08/07]
- 535 4. National Academies of Sciences Engineering and Medicine. Crossing the global quality  
536 chasm: Improving health care worldwide. Washington (DC): The National Academies  
537 Press 2018.
- 538 5. Hanefeld J, Powell-Jackson T, Balabanovaa D. Understanding and measuring quality of care:  
539 dealing with complexity. *Bull World Health Organ* 2017;95:368–74. doi:  
540 10.2471/BLT.16.179309
- 541 6. Goodrich J, Fitzsimons B. Capturing patient experience to improve healthcare services. *Nurs*  
542 *Stand* 2019;34(8):24-28. doi: 10.7748/ns.2018.e11177 [published Online First:  
543 2018/11/02]
- 544 7. Golda N, Beeson S, Kohli N, et al. Analysis of the patient experience measure. *JAM ACAD*  
545 *DERMATOL* 2018;78(4) doi: 10.1016/j.jaad.2017.03.051

- 546 8. Fujisawa R, Klazinga NS. Measuring patient experiences (PREMS): Progress made by the  
547 OECD and its member countries between 2006 and 2016. OECD Health Working Papers  
548 102. Paris, 2017.
- 549 9. Doyle C, Lennox L, Bell D. A systematic review of evidence on the links between patient  
550 experience and clinical safety and effectiveness. *BMJ Open* 2013;3(1) doi:  
551 10.1136/bmjopen-2012-001570
- 552 10. Anhang Price R, Elliott MN, Zaslavsky AM, et al. Examining the role of patient experience  
553 surveys in measuring health care quality. *Med Care Res Rev* 2014;71(5):522-54. doi:  
554 10.1177/1077558714541480 [published Online First: 2014/07/17]
- 555 11. Soors W, Devadasan N, Durairaj V, et al. Community Health Insurance and Universal  
556 Coverage: Multiple paths, many rivers to cross. Geneva: World Health Organization,  
557 2010.
- 558 12. Lagomarsino G, Garabrant A, Adyas A, et al. Moving towards universal health coverage:  
559 health insurance reforms in nine developing countries in Africa and Asia. *The Lancet*  
560 2012;380(9845):933-43. doi: 10.1016/s0140-6736(12)61147-7 [published Online First:  
561 2012/09/11]
- 562 13. Lagomarsino G, Kundra SS. Overcoming the Challenges of Scaling Voluntary Risk Pools in  
563 Low-Income Settings: Results for Development Institute, 2008.
- 564 14. Boateng D, Awunyor-Vitor D. Health insurance in Ghana: evaluation of policy holders'  
565 perceptions and factors influencing policy renewal in the Volta region. *International*  
566 *Journal for Equity in Health* 2013;12(50)
- 567 15. Alhassan RK, Duku SO, Janssens W, et al. Comparison of Perceived and Technical  
568 Healthcare Quality in Primary Health Facilities: Implications for a Sustainable National  
569 Health Insurance Scheme in Ghana. *PLoS One* 2015;10(10):e0140109. doi:  
570 10.1371/journal.pone.0140109 [published Online First: 2015/10/16]
- 571 16. Aggrey M, Appiah SCY. The influence of clients' perceived quality on health care  
572 utilization. *International Journal of Innovation and Applied Studies* 2014;9(2):918-24.
- 573 17. Akachi Y, Kruk ME. Quality of care: measuring a neglected driver of improved health. *Bull*  
574 *World Health Organ* 2017;95(6):465-72. doi: 10.2471/BLT.16.180190 [published Online  
575 First: 2017/06/13]
- 576 18. Dror DM, Hossain SAS, Majumdar A, et al. What Factors Affect Voluntary Uptake of  
577 Community-Based Health Insurance Schemes in Low- and Middle-Income Countries? A  
578 Systematic Review and Meta-Analysis. *PLoS One* 2016;11(8):e0160479. doi:  
579 10.1371/journal.pone.0160479 [published Online First: 2016/09/01]
- 580 19. Fadlallah R, El-Jardali F, Hemadi N, et al. Barriers and facilitators to implementation, uptake  
581 and sustainability of community-based health insurance schemes in low- and middle-

- 582 income countries: a systematic review. *Int J Equity Health* 2018;17(1):13. doi:  
583 10.1186/s12939-018-0721-4 [published Online First: 2018/01/31]
- 584 20. Primary Health Care on the Road to Universal Health Coverage: 2019 global monitoring  
585 report. Geneva: WHO, UNICEF, UNFPA, OECD and World Bank., 2019.
- 586 21. Kruk ME, Gage AD, Arsenault C, et al. High-quality health systems in the Sustainable  
587 Development Goals era: time for a revolution. *The Lancet* 2018;6(11):e1196-e252. doi:  
588 10.1016/S2214-109X(18)30386-3 [published Online First: 2018/09/10]
- 589 22. Alhassan RK, Nketiah-Amponsah E, Arhinful DK. A Review of the National Health  
590 Insurance Scheme in Ghana: What Are the Sustainability Threats and Prospects? *PLoS*  
591 *One* 2016;11(11):e0165151. doi: 10.1371/journal.pone.0165151 [published Online First:  
592 2016/11/11]
- 593 23. Adebayo EF, Uthman OA, Wiysonge CS, et al. A systematic review of factors that affect  
594 uptake of community-based health insurance in low-income and middle-income  
595 countries. *BMC Health Serv Res* 2015;15(543):543. doi: 10.1186/s12913-015-1179-3  
596 [published Online First: 2015/12/10]
- 597 24. Hussien M, Azage M. Barriers and Facilitators of Community-Based Health Insurance Policy  
598 Renewal in Low- and Middle-Income Countries: A Systematic Review. *Clinicoecon*  
599 *Outcomes Res* 2021;13:359-75. doi: 10.2147/CEOR.S306855 [published Online First:  
600 2021/05/20]
- 601 25. Tefera BB, Kibret MA, Molla YB, et al. The interaction of healthcare service quality and  
602 community-based health insurance in Ethiopia. *PLoS One* 2021;16(8):e0256132. doi:  
603 10.1371/journal.pone.0256132 [published Online First: 2021/08/20]
- 604 26. Shigute Z, Mebratie AD, Sparrow R, et al. The Effect of Ethiopia's Community-Based Health  
605 Insurance Scheme on Revenues and Quality of Care. *Int J Environ Res Public Health*  
606 2020;17(22) doi: 10.3390/ijerph17228558 [published Online First: 2020/11/22]
- 607 27. FMHO. Health Sector Transformation Plan 2016-2020. Addis Ababa, Ethiopia: Federal  
608 Ministry of Health, 2015.
- 609 28. Zonal Health Department. Community-based health insurance performance report of South  
610 Wollo Zone, 2020.
- 611 29. Bao Y, Fan G, Zou D, et al. Patient experience with outpatient encounters at public hospitals  
612 in Shanghai: Examining different aspects of physician services and implications of  
613 overcrowding. *PLoS One* 2017;12(2) doi: 10.1371/journal.pone.0171684
- 614 30. Hu Y, Zhang Z, Xie J, et al. The Outpatient Experience Questionnaire of comprehensive  
615 public hospital in China: development, validity and reliability. *Int J Qual Health Care*  
616 2017;29(1):40-46. doi: 10.1093/intqhc/mzw133

- 617 31. Baltussen R, Ye Y. Quality of care of modern health services as perceived by users and non-  
618 users in Burkina Faso. *Int J Qual Health Care* 2006;18(1):30-34.
- 619 32. Robyn PJ, Bärnighausen T, Souares A, et al. Does enrollment status in community-based  
620 insurance lead to poorer quality of care? Evidence from Burkina Faso. *International*  
621 *Journal for Equity in Health* 2013;12(31)
- 622 33. Webster TR, Mantopoulos J, Jackson E, et al. A brief questionnaire for assessing patient  
623 healthcare experiences in low-income settings. *Int J Qual Health Care* 2011;23(3):258–  
624 68.
- 625 34. Benson T, Potts HW. A short generic patient experience questionnaire: howRwe  
626 development and validation. *BMC Health Serv Res* 2014;14:499. doi: 10.1186/s12913-  
627 014-0499-z [published Online First: 2014/10/22]
- 628 35. Altindis S. Job motivation and organizational commitment among the health professionals: A  
629 questionnaire survey *Afr J Bus Manage* 2011;5(21):8601-09.
- 630 36. Alpern R, Canavan ME, Thompson JT, et al. Development of a brief instrument for assessing  
631 healthcare employee satisfaction in a low-income setting. *PLoS One* 2013;8(11):e79053.  
632 doi: 10.1371/journal.pone.0079053 [published Online First: 2013/11/14]
- 633 37. Hair JF, Black WC, Babin BJ, et al. *Multivariate Data Analysis*. 8th ed: CENAGE 2019.
- 634 38. Merlo J, Chaix B, Yang M, et al. A brief conceptual tutorial of multilevel analysis in social  
635 epidemiology: linking the statistical concept of clustering to the idea of contextual  
636 phenomenon. *J Epidemiol Community Health* 2005;59(6):443-9. doi:  
637 10.1136/jech.2004.023473 [published Online First: 2005/05/25]
- 638 39. SNIJDERS TAB, BOSKER RJ. *Multilevel Analysis: An Introduction To Basic And*  
639 *Advanced Multilevel Modeling*. 2nd ed. London, UK: SAGE 2012.
- 640 40. Mebratie AD, Sparrow R, Yilma Z, et al. Enrollment in Ethiopia's Community-Based Health  
641 Insurance Scheme. *World Development* 2015;74:58-76. doi:  
642 10.1016/j.worlddev.2015.04.011
- 643 41. Benjamin J, Haile M, Abebe Z. *Community-Based Health Insurance Program in Ethiopia:*  
644 *Assessing Institutional and Financial Sustainability*. Rockville, MD: Health Finance &  
645 *Governance Project, Abt Associates Inc., 2018.*
- 646 42. Amo-Adjei J, Anku PJ, Amo HF, et al. Perception of quality of health delivery and health  
647 insurance subscription in Ghana. *BMC Health Serv Res* 2016;16:317. doi:  
648 10.1186/s12913-016-1602-4 [published Online First: 2016/07/31]
- 649 43. Duku SKO, Nketiah-Amponsah E, Janssens W, et al. Perceptions of healthcare quality in  
650 Ghana: Does health insurance status matter? *PLoS One* 2018;13(1):e0190911. doi:  
651 10.1371/journal.pone.0190911 [published Online First: 2018/01/18]



- 652 44. Eseta WA, Lemma TD, Geta ET. Magnitude and Determinants of Dropout from Community-  
653 Based Health Insurance Among Households in Manna District, Jimma Zone, Southwest  
654 Ethiopia. *Clinicoecon Outcomes Res* 2020;12:747-60. doi: 10.2147/CEOR.S284702  
655 [published Online First: 2020/12/29]
- 656 45. Herberholz C, Fakihammed WA. Determinants of Voluntary National Health Insurance  
657 Drop-Out in Eastern Sudan. *Appl Health Econ Health Policy* 2016;15(2):215-26. doi:  
658 10.1007/s40258-016-0281-y [published Online First: 2016/10/04]
- 659 46. Mladovsky P. Why do people drop out of community-based health insurance? Findings from  
660 an exploratory household survey in Senegal. *Soc Sci Med* 2014;107:78-88. doi:  
661 10.1016/j.socscimed.2014.02.008 [published Online First: 2014/03/13]
- 662 47. Kraus TW, Buchler MW, Herfarth C. Relationships between volume, efficiency, and quality  
663 in surgery--a delicate balance from managerial perspectives. *World J Surg*  
664 2005;29(10):1234-40. doi: 10.1007/s00268-005-7988-5 [published Online First:  
665 2005/09/02]
- 666 48. Arsenault C, Yakob B, Tilahun T, et al. Patient volume and quality of primary care in  
667 Ethiopia: findings from the routine health information system and the 2014 Service  
668 Provision Assessment survey. *BMC Health Serv Res* 2021;21(1) doi: 10.1186/s12913-  
669 021-06524-y
- 670 49. Kruk ME, Leslie HH, Verguet S, et al. Quality of basic maternal care functions in health  
671 facilities of five African countries: an analysis of national health system surveys. *The*  
672 *Lancet Global Health* 2016;4(11):e845-e55. doi: 10.1016/s2214-109x(16)30180-2
- 673 50. Kruse FM, van Nieuw Amerongen MC, Borghans I, et al. Is there a volume-quality  
674 relationship within the independent treatment centre sector? A longitudinal analysis.  
675 *BMC Health Serv Res* 2019;19(1):853. doi: 10.1186/s12913-019-4467-5 [published  
676 Online First: 2019/11/23]
- 677 51. Kvist T, Voutilainen A, Mäntynen R, et al. The relationship between patients' perceptions of  
678 care quality and three factors: nursing staff job satisfaction, organizational characteristics  
679 and patient age *BMC Health Serv Res* 2014;14(466)
- 680 52. Raffoul M, Moore M, Kameron D, et al. A Primary Care Panel Size of 2500 Is neither  
681 Accurate nor Reasonable. *J Am Board Fam Med* 2016;29(4):496-9. doi:  
682 10.3122/jabfm.2016.04.150317 [published Online First: 2016/07/09]
- 683 53. [Dataset] Hussien M, Azage M, Bayou NB (2021), Perceived quality of care in health centers  
684 affiliated with community-based health insurance in two districts of Northeastern  
685 Ethiopia, Dryad repository, <https://doi.org/10.5061/dryad.ncjsxksw5>
- 686



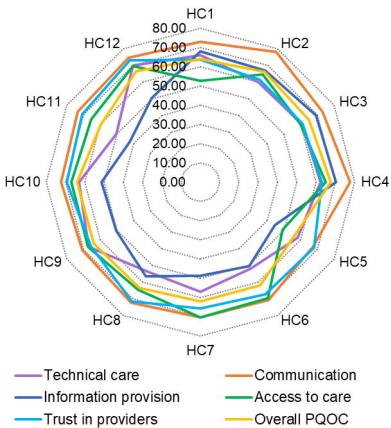

Source: https://medrxiv.org/content/10.1101/2021.10.18.21265144v1.full.pdf
