1 Perceived quality of care among households ever enrolled in a  
2 community-based health insurance scheme in two districts of  
3 northeast Ethiopia: a multilevel analysis

4

5

6 Mohammed Hussien<sup>1\*</sup>, Muluken Azage<sup>2</sup> and Negalign Berhanu Bayou<sup>3</sup>

7

8

9 <sup>1</sup>Department of Health Systems Management and Health Economics, School of Public Health,  
10 College of Medicine and Health Sciences, Bahir Dar University, Bahir Dar, Ethiopia.

11 <sup>2</sup>Department of Environmental Health, School of Public Health, College of Medicine and Health  
12 Sciences, Bahir Dar University, Bahir Dar, Ethiopia.

13 <sup>3</sup>Department of Health Policy and Management, Faculty of Public Health, Institute of Health,  
14 Jimma University, Jimma, Ethiopia.

15

16

17

18 \*Correspondence: muhamedun@gmail.com

## 19 **ABSTRACT**

20 **Objectives:** The purpose of this study was to examine how clients perceived about the quality  
21 of health care they received and to identify associated factors at the individual and facility-level.

22 **Design:** A community-based, cross-sectional study

23 **Setting:** Health centers in two districts

24 **Participants:** 1081 rural households who had ever been enrolled in a community-based health  
25 insurance and had visited a health center at least once in the previous 12 months, as well as  
26 194 health care providers working in 12 health centers.

27 **Outcome measures:** The outcome variable of interest was the perceived quality of care, which  
28 was measured using a 17-item scale. Respondents were asked to rate the degree to which they  
29 agreed on 5-point response items relating to their experiences with health care in the  
30 outpatient departments of nearby health centers. A multilevel linear regression analysis was  
31 used to identify predictors of perceived quality of care.

32 **Results:** The mean perceived quality of care was 70.28 (SD=8.39). Five dimensions of perceived  
33 quality of care were extracted from the factor analysis, with the patient-provider  
34 communication dimension having the highest mean score (M=77.84, SD=10.12), and  
35 information provision having the lowest (M=64.67, SD=13.87). Wealth status, current insurance  
36 status, perceived health status, presence of chronic illness, time to a recent health center visit,  
37 work experience of health care providers and patient volume were the factors significantly

38 associated with perceived quality of care. An interaction term between patient volume and  
39 staff job satisfaction also showed significant association.

40 **Conclusions:** Much work remains to improve the quality of care, especially on information  
41 provision and access to care quality dimensions. A range of individual and cluster-level  
42 characteristics influence the perceived quality of care. For a better quality of care, it is vital to  
43 optimize the patient-provider ratio, and enhance staff job satisfaction.

#### 44 **Strengths and limitations of this study**

- 45 ▶ The study tried to assess the quality of care from the clients' point of view using a  
46 validated multidimensional scale.
- 47 ▶ This is the first cross-sectional study in Ethiopia, which considered health center (cluster)  
48 level variables that have association with perceived quality of care.
- 49 ▶ We tested for the existence of endogeneity between current insurance status and  
50 quality of care. Although the results indicated no evidence of endogeneity, it is still  
51 possible due to omitted variables. Active insurance members may report a higher  
52 perception score quality of care as a result of their desire to stay in the scheme.
- 53 ▶ Because of the cross-sectional nature of the study, it is impossible to establish a cause-  
54 and-effect relationship.

## 55 **INTRODUCTION**

56 Health care providers and patients define quality of care differently and attach varying levels of  
57 importance to its attributes. When assessing the quality of care, health care professionals tend  
58 to prioritize technical competence, while patients place a high value on patient-centeredness,  
59 amenities, and reputation.<sup>1</sup> The emphasis on health care quality measurement has shifted away

60 from the viewpoints of health care providers to people-centered approaches that rely on  
61 patient perceptions.<sup>2-4</sup> Patients' perception of health care quality has become an essential  
62 element of quality measurement due to its link with health service utilization. It is based on a  
63 mix of patient experiences, processed information and rumors.<sup>5</sup> Patient experience surveys  
64 elicit data on the transactional components of care, which are process-related, as well as the  
65 interpersonal interactions that occur over the course of care.<sup>6</sup> Individuals receiving care are  
66 asked about their experiences of health facility encounters to report if particular processes or  
67 events occurred.<sup>7</sup> Patient experience measurements have received increased attention and are  
68 widely employed to inform quality improvement, and pay-for-performance.<sup>8</sup> Patient experience  
69 is consistently and positively associated with patient safety and clinical effectiveness,  
70 adherence to prevention and treatment recommendations, and technical quality of care.<sup>9,10</sup>

71 Quality of health care is vital to the success of universal health coverage (UHC) initiatives, like  
72 community-based health insurance (CBHI). The development of CBHI schemes must be  
73 accompanied by improvements in the quality of care.<sup>11, 12</sup> To build sustainable CBHI schemes,  
74 members must believe that the benefits of health care provided via health insurance coverage  
75 outweigh the benefits of not being insured.<sup>13</sup> Patients' positive experiences with the quality of  
76 care provided under insurance schemes increase their trust in the health system and insurance  
77 schemes.<sup>14, 15</sup> As a result, they are more likely to use health care services and participate in  
78 health insurance plans.<sup>16</sup> If insured clients are unable to access high quality services, they lose  
79 trust in service providers and seek care elsewhere,<sup>17</sup> making them less likely to pay premiums.<sup>18</sup>

80 <sup>19</sup>

81 The ultimate goal of UHC is to ensure that all people who need health services receive high  
82 quality care without financial strain.<sup>20</sup> Although increased health care coverage is promising  
83 with the implementation of CBHI, quality of care remains a key impediment to achieving UHC.<sup>20</sup>  
84 <sup>21</sup> Increasing access to essential health services without improving their quality would not bring  
85 the intended health outcomes.<sup>2 4</sup> For example, more than eight million deaths amenable to a  
86 high quality of care occurred in low- and middle-income countries, making poor-quality of care  
87 a bigger obstacle to mortality reduction than lack of access to care.<sup>21</sup>

88 Poor quality of care is also a major issue that jeopardizes the long-term viability of many CBHI  
89 schemes.<sup>11 22</sup> Findings of systematic reviews revealed that the quality of care was a key factor  
90 that influenced enrollment and renewal decisions of CBHI membership.<sup>23 24</sup> Some quality  
91 concerns include ‘unavailability and perceived poor quality of prescribed medicines,  
92 misbehavior of health professionals, and the differential treatment of the insured in favor of  
93 the uninsured patients, unclean hospital environment, long queues, lack of diagnostic  
94 equipment, and long waiting hours to obtain health care’.<sup>24</sup>

95 To promote optimal utilization, stable finance, and better outcomes, the quality of health care  
96 must be monitored on a regular basis.<sup>17</sup> Previous studies in Ethiopia focused on surveys of  
97 client satisfaction and did not employ multidimensional measurement scales.<sup>25 26</sup> To our  
98 knowledge, the quality of care delivered under the CBHI in Ethiopia has never been investigated  
99 using multidimensional metrics from the perspective of service users at the community level.  
100 There is also a paucity of literature on facility-level variables that influence the quality of care.

101 Therefore, the purpose of this study was to examine the perceived quality of care (PQoC) from  
102 the perspective of clients, and identify associated factors at the individual and facility-level.

103 Improving quality of care and CBHI are among Ethiopia's top priorities in its health sector  
104 strategic plan.<sup>27</sup> The findings of this study will inform relevant stakeholders on the current state  
105 of clients' perceptions of the quality of care, and will be an essential input for quality  
106 improvement initiatives. It will also provide useful information for decision-makers to address  
107 challenges in the country's endeavors to establish higher-level insurance pools.

## 108 **METHODS**

### 109 **Study setting and population**

110 A community-based cross-sectional study was conducted in rural parts of two neighboring  
111 districts in northeast Ethiopia, Tehulederie and Kallu. Tehulederie is divided into 20 rural and  
112 seven urban *Kebeles* (subdistricts) with a population of 145,625, of which 87.5% reside in rural  
113 areas. There are five health centers and one primary hospital in the district. It was one of the 13  
114 districts in Ethiopia where CBHI was piloted in 2011. The scheme was introduced in Kallu district  
115 after two years, in July 2013. Kallu is divided into 36 rural and four urban *Kebeles*, and has nine  
116 health centers. It is the most populous district in the zone, with a population of 234,624, of  
117 which 89.11% live in the rural area.<sup>28</sup>

118 The study population of interest were rural households who had ever been enrolled in the CBHI  
119 scheme before January 2020. To minimize recall bias, households who had not used health care  
120 in the 12-month period before data collection were excluded from the study. The sample size

121 was calculated using MedCalc software by assuming a mean difference of two independent  
122 groups. A previous study on PQoC reported mean scores of 5.2 and 5.4 with standard  
123 deviations (SD) of 0.8 and 0.7 among insured and uninsured respondents, respectively.<sup>29</sup> Using  
124 this output and assuming an 80% power, 95% confidence level and equally sized groups, a  
125 sample size of 446 was calculated. Considering a design effect of 1.5 attributable to multi-stage  
126 sampling and a potential non-response rate of 10%, the effective sample size was estimated to  
127 be 736 households. **Alternative sample size of 1257 was calculated for a companion article as**  
128 **part of a research project examining the sustainability of a CBHI in Ethiopia.** Among those, 1081  
129 eligible households participated in this study. Furthermore, 194 health care providers from 12  
130 health centers participated in the study to provide cluster-level data.

### 131 **Data collection and measurement**

132 The data were collected from 04 February to 21 March 2021. The study participants were  
133 recruited using a three-level multistage sampling approach. First, 12 clusters of *Kebeles*  
134 organized under a health center catchment area were selected. Then, 14 rural *Kebeles* were  
135 drawn randomly using a lottery method proportional to the number of *Kebeles* under each  
136 cluster. Accordingly, five *Kebeles* from Tehulederie and nine from Kallu were included. A list of  
137 households who have ever been enrolled in the CBHI was obtained from the membership  
138 registration logbook of each *Kebele*. The required sample was generated at random from each  
139 *Kebele*, proportional to the number of households who have ever **been** enrolled in the scheme,  
140 using random number generator software.

141 Individual-level data was collected through face-to-face interviews with household heads at  
142 their homes or workplace using a structured questionnaire via an electronic data collection  
143 platform. The data collectors submit the completed forms to a data aggregating server on a  
144 daily basis, which allowed us to review the submissions and streamline the supervision process.

145 The PQoC, which is the outcome variable of interest, was measured using a 17-item scale  
146 designed after a thorough review of validated tools.<sup>29-33</sup> Respondents were asked to rate the  
147 extent to which they agreed on a set of items relating to their experiences with the health care  
148 they received in the outpatient departments of nearby health centers. Each item was designed  
149 on a 5-point response format, with 1=strongly disagree, 2=disagree, 3=neutral, 4=agree and  
150 5=strongly agree. The summary scores for the PQoC and its dimensions were calculated for  
151 individual respondents by adding the scores for each item. This gives a scale ranging from 17  
152 (1×17) to 85 (5×17) for the overall PQoC score. When reporting the results, the scores were  
153 arithmetically transformed to a scale of 20 to 100.<sup>34</sup> This allows the comparison of mean scores  
154 of PQoC with its dimensions, and measurement items on a common scale.

155 Wealth index was generated using the principal component analysis method. The scores for 15  
156 types of assets were translated into latent factors, and a wealth index was created based on the  
157 first factor that explained most of the variation. The study households were grouped into  
158 wealth tertile – lower, medium and higher based on the index. Perceived health status was  
159 measured based on a household head’s subjective assessment of the health status of the  
160 household, and was rated as “poor, fair, good, very-good, or excellent”. However, for analysis



161 purpose, it was recategorized into “fair, good, and very-good”, by merging the two extreme  
162 response categories to the next option due to fewer replies.

163 Before the data collection, the questionnaire was pre-tested on a sample of 84 randomly  
164 selected participants in one *Kebele*. As part of the pre-test, a cognitive interview was conducted  
165 on selected items using the verbal probe technique among eight respondents to determine if  
166 the items and response categories were understood, and interpreted by the potential  
167 respondents as intended. Accordingly, the phrasing of some items and response options were  
168 modified, and some items were omitted.

169 Cluster-level data were collected from 12 health centers that provide health care for the  
170 population in the sampled *Kebeles*. Patient volume data were obtained by reviewing the  
171 monthly service delivery reports of health centers, while data related to work experience,  
172 affective commitment and job satisfaction were collected through a self-administered  
173 questionnaire among health care providers who worked more than one year in the current  
174 facility.

175 Patient volume was measured using the daily average number of patients managed by a health  
176 care provider in the outpatient department. It was calculated by dividing the number of  
177 patients who visited the health center in the last six months before the study by the number of  
178 working days, and then by the number of consultation rooms in each health center.<sup>35</sup> Affective  
179 commitment and job satisfaction were composite variables which were assessed using a 5-  
180 point Likert scale. Affective commitment was measured with a seven-item questionnaire based

181 on a modified version of the Meyer et al. scale, which had previously been used in a hospital  
182 setup.<sup>36</sup> Staff job satisfaction was measured using a 10-item scale, which was adapted from a  
183 previous study among health care workers in Ethiopia.<sup>37</sup> Average affective commitment and job  
184 satisfaction scores were computed for each health center.

## 185 **Data analysis**

186 The data were analyzed using Stata version 17.0. Exploratory factor analysis was performed to  
187 assess the validity of the quality measurement scale. The Bartlett's test of Sphericity and Kaiser-  
188 Mayer-Olkin's (KMO) measure of sampling adequacy were performed to assess the  
189 appropriateness of the data for factor analysis. The principal component factor method of  
190 extraction and Promax rotation with Kaiser Normalization was used. The Eigenvalue greater  
191 than one decision rule was used to determine the appropriate number of factors to be  
192 extracted. Items with loadings below 0.40 were removed from the analysis.<sup>38</sup> Correlation  
193 coefficients were used to test construct validity. Item-total score correlation, dimension-total  
194 score correlation and dimension intercorrelation were computed. The total score was the mean  
195 score of the ratings for all items of the scale, and the dimension score was the factor scores. A  
196 questionnaire has good construct validity when the item-total score correlations are higher  
197 than 0.40, dimension intercorrelations are less than 0.80, and dimension-total score  
198 correlations are higher than dimension intercorrelations.<sup>31</sup> Cronbach's alpha coefficients were  
199 generated for each dimension to assess the internal consistency. Reliability of the scale was  
200 considered acceptable if Cronbach's alpha coefficient was 0.60 or higher.<sup>38</sup>

201 To compare mean scores of PQoC and its dimensions among subgroups, an independent t-test  
202 and a one-way analysis of variance (ANOVA) with Tukey's post-hoc test were used. Because the  
203 outcome variable was considered as a continuous variable, a multilevel linear regression model  
204 was fitted to identify its predictors. The Restricted Maximum Likelihood estimation approach  
205 was used because it is appropriate for smaller cluster sizes.<sup>39</sup> The PQoC was assumed to be  
206 influenced by the characteristics of households (individual-level variables) as well as the  
207 characteristics of health centers (cluster-level variables). Cluster-level data were linked to  
208 individual-level data based on the usual source of health care for each study participant.  
209 Considering the hierarchical structure of the data, where patients are nested within health  
210 centers, a two-level linear regression model was applied. Four models were estimated to  
211 choose the one that best fits the data. The first model, or the null model (a model without  
212 predictors) is given by:

$$213 \quad Y_{ij} = \gamma_{00} + u_{0j} + \varepsilon_{ij} \quad (1)$$

214 The null model estimates three parameters: the average intercept ( $\gamma_{00}$ ), the between health  
215 center error, or deviation, from the average intercept ( $u_{0j}$ ), and the individual-level residual, or  
216 variation in individual scores within health centers ( $\varepsilon_{ij}$ ). The second model estimated PQoC ( $Y_{ij}$ )  
217 for individual household  $i$  at health center  $j$ . We treat PQoC as a function of a matrix of  
218 individual-level variables ( $X_{ij}$ ) which include age, gender, education and marital status of the  
219 household head; wealth status; household size; current health insurance status; presence of

220 chronic illness in the household; perceived health status, and time to a recent visit to a health  
221 center, and expressed as:

$$222 \quad Y_{ij} = \gamma_{00} + \gamma_{10}X_{1ij} + \gamma_{20}X_{2ij} + u_{1j}X_{1ij} + u_{2j}X_{2ij} + \dots + \gamma_{n0}X_{nij} + u_{nj}X_{nij} + u_{0j} + \varepsilon_{ij} \quad (2)$$

223 where  $u_{1j}, u_{2j}, \dots, u_{nj}$  indicate the random error terms connected to each  $X_{ij}$ .

224 The third model estimated the PQoC as a function of cluster-level variables ( $Z_j$ ) that include  
225 average work experience, affective commitment and job satisfaction of health care providers,  
226 and patient volume. The model takes into account the differences between health centers and  
227 explains these differences in terms of these characteristics. It is given by:

$$228 \quad Y_{ij} = \gamma_{00} + \gamma_{01}Z_{1j} + \gamma_{02}Z_{2j} + \dots + \gamma_{0n}Z_{nj} + \gamma_{11}PV_j * JS_j + u_{0j} + \varepsilon_{ij} \quad (3)$$

229 where  $PV_j * JS_j$  indicates an interaction term between patient volume and job satisfaction in  
230 which job satisfaction was assumed to moderate the effect between patient volume and PQoC.  
231 The interaction effect was tested by plotting the marginal effects of interaction terms. The two  
232 variables were centered towards the grand mean to facilitate the interpretation of the  
233 coefficients.

234 By combining model II and III, the fourth model estimated the PQoC as a function of both  
235 individual and cluster-level variables, and can be written as:

$$236 \quad Y_{ij} = \gamma_{00} + \gamma'_{10}X_{ij} + \gamma'_{01}Z_j + \gamma_{11}PV_j * JS_j + u'_j X_{ij} + u_{0j} + \varepsilon_{ij} \quad (4)$$

237 where  $\gamma_{10}$  and  $\gamma_{01}$  are the vector of coefficients of  $n$  explanatory variables whose values are at  
238  $X_{1ij}, X_{2ij}, \dots, X_{nij}$  for the  $i^{th}$  individual within the  $j^{th}$  cluster, and  $Z_{1j}, Z_{2j}, \dots, Z_{nj}$  for the  $j^{th}$  cluster,

239 respectively. The intercept  $\gamma_{00}$  and slopes  $\gamma_{01}$ ,  $\gamma_{10}$  and  $\gamma_{11}$  are fixed effects, while  $u_{0j}$ ,  $u_j$  and  $\varepsilon_{ij}$  are  
240 random effects.

241 This multilevel regression decomposes the total variances into two independent components:  
242  $\sigma_e^2$ , which is the variance of individual-level errors  $\varepsilon_{ij}$ , and  $\sigma_{u0}^2$ , which is the variance of cluster-  
243 level errors  $u_{0j}$ . From this model we can define the intraclass correlation (ICC) by the equation:<sup>40</sup>

$$ICC = \sigma_{u0}^2 / (\sigma_{u0}^2 + \sigma_e^2)$$

244 The ICC and proportional change in variance (PCV) were used to report the measures of  
245 variation (random effects). The need for multilevel analysis, which considers cluster-level  
246 factors, was tested using the ICC. The ICC shows the variation in PQoC accounted for cluster-  
247 level characteristics. Statistically significant variability between health centers justifies the need  
248 to consider cluster-level factors.<sup>41</sup> The PCV expresses the change in the cluster-level variance  
249 between the empty model and models with more terms, and is calculated by  $PCV = (V_A - V_B)/V_A$ ,  
250 where  $V_A$  = variance of the null model, and  $V_B$  = variance of the model with more terms. It  
251 measures the total variation explained by individual and cluster-level factors.

252 The measures of association (fixed-effects) estimate the association between the PQoC score  
253 and various explanatory variables. The existence of a statistically significant association was  
254 determined at p-values of <0.05. The degree of the association was assessed using regression  
255 coefficients, and their statistical significance was determined at a 95% confidence interval.  
256 Models were compared using the Deviance Information Criteria (DIC) and Akaike Information  
257 Criteria (AIC). The best fit model was determined to have the lowest DIC and AIC values. The

258 preliminary analysis confirmed no violation of the assumptions of normality, linearity,  
259 homoscedasticity, and multicollinearity. The presence of multicollinearity was determined using  
260 Variance Inflation Factor with a cutoff point of 5.

## 261 **Patient and Public Involvement**

262 No patient involved

## 263 **RESULTS**

### 264 **Background characteristics of the study population**

265 The household survey included 1081 respondents who had visited a health center at least once  
266 in the previous 12 months prior to the study. The average age of the study participants was  
267 49.25 years (SD=12.07), with slightly more than half (51.34%) were between the age ranges of  
268 45 and 64, and 12.67% being 65 and older. Of the total household heads, 938 (86.77%) were  
269 men, and 1003 (92.78%) were currently married. One-fifth of the study participants (20.91%)  
270 attended formal education, and 62.72% had a household size of five or above.

271 Nearly ninety percent of the households (87.14%) were active members of the CBHI scheme at  
272 the time of the study. A quarter of households (25.72%) had one or more individuals with a  
273 known chronic illness informed by a healthcare provider. One-third of respondents (33.58%)  
274 rated their household health status as very-good, while 207 (19.15%) and 511 (47.27%) rated it  
275 as fair and good, respectively. Nearly half of the households (46.16%) had visited a health  
276 center within three months prior to the study, while 31.73% and 22.11% had their most recent  
277 visit to a health center before 6-12 and 3-6 months, respectively (Table 1).

278 The median work experience of health care providers involved in this study ranges from three  
279 to ten years. The mean scores of affective commitment and job satisfaction were 29.00 and  
280 30.95 (SD=2.08 and 3.17), respectively. The average patient volume was 32.17 per day per care  
281 provider, with a range of 19 to 43 (SD=7.83).

## 282 **Factor analysis**

283 Sampling was adequate as measured by the KMO (0.83), and Bartlett's test of sphericity was  
284 significant ( $p < 0.001$ ). Two items were removed from further analysis due to loadings below  
285 0.40, and one item was removed due to low communality. The factor analysis extracted five  
286 dimensions that explained 59.25% of the total variation (online supplemental file 1). The item-  
287 total score correlations ranged from 0.268 to 0.622, four items had correlations less than 0.40.  
288 The dimension intercorrelations varied from 0.031 to 0.434, all of which were less than the 0.80  
289 criterion, indicating that each dimension was distinct enough to be considered an independent  
290 measure. Dimension-total score correlation ranged between 0.417 to 0.772, all significant at a  
291 p-value of 0.001, and were higher than dimension intercorrelations. The scale was tested for  
292 reliability and had an overall Cronbach's alpha coefficient of 0.804. The Cronbach's alpha  
293 coefficients for the five dimensions exceeded 0.60, except for the access to care subscale,  
294 which had an alpha coefficient of 0.531.

295 Table 1: Independent t-test and one-way ANOVA comparing mean scores of the PQoC (20-100 scale) across  
296 respondent characteristics in two districts of northeast Ethiopia, 2021

| Variable     | Categories | N=1081 | %     | PQoC score |      | t/F-test |
|--------------|------------|--------|-------|------------|------|----------|
|              |            |        |       | M          | SD   |          |
| Age in years | 25 – 44    | 389    | 35.99 | 69.97      | 7.78 | 1.08     |

|                          |                  |             |            |                    |              |                    |
|--------------------------|------------------|-------------|------------|--------------------|--------------|--------------------|
|                          | 45 – 64          | 555         | 51.34      | 70.26              | 8.52         |                    |
|                          | 65+              | 137         | 12.67      | 71.20              | 9.49         |                    |
| Gender                   | Men              | 938         | 86.77      | 70.15              | 8.21         | -1.31              |
|                          | Women            | 143         | 13.23      | 71.13              | 9.51         |                    |
| Marital status           | Divorced/widowed | 78          | 7.22       | 71.61              | 10.95        | 1.46               |
|                          | Married          | 1003        | 92.78      | 70.17              | 8.16         |                    |
| Attend formal education  | No               | 855         | 79.09      | 70.29              | 8.48         | 0.07               |
|                          | Yes              | 226         | 20.91      | 70.24              | 8.05         |                    |
| Household size           | < Five           | 403         | 37.28      | 70.85              | 8.63         | 1.73               |
|                          | ≥ Five           | 678         | 62.72      | 69.94              | 8.25         |                    |
| Wealth tertile           | Lowest           | 361         | 33.40      | 71.77              | 9.15         | 8.83 <sup>#</sup>  |
|                          | Medium           | 360         | 33.30      | 69.36 <sup>b</sup> | 8.16         |                    |
|                          | Highest          | 360         | 33.30      | 69.70 <sup>b</sup> | 7.62         |                    |
| Current insurance status | Ex-member        | 139         | 12.86      | 67.66              | 9.65         | -3.96 <sup>#</sup> |
|                          | Active-member    | 942         | 87.14      | 70.66              | 8.13         |                    |
| Perceived health status  | Fair             | 207         | 19.15      | 72.28              | 8.84         | 8.04 <sup>#</sup>  |
|                          | Good             | 511         | 47.27      | 70.08 <sup>b</sup> | 7.83         |                    |
|                          | Very-good        | 363         | 33.58      | 69.41 <sup>b</sup> | 8.73         |                    |
| Chronic illness          | No               | 803         | 74.28      | 69.54              | 8.29         | -4.96 <sup>#</sup> |
|                          | Yes              | 278         | 25.72      | 72.40              | 8.33         |                    |
| Last health center visit | < 3 months       | 499         | 46.16      | 70.75 <sup>b</sup> | 8.99         | 4.78 <sup>§</sup>  |
|                          | 3-6 months       | 239         | 22.11      | 70.94 <sup>b</sup> | 7.60         |                    |
|                          | 6-12 months      | 343         | 31.73      | 69.13              | 7.92         |                    |
| <b>Total</b>             |                  | <b>1081</b> | <b>100</b> | <b>70.28</b>       | <b>70.28</b> |                    |

297 Statistical significance for t-test/F-test is indicated by <sup>§</sup> $p < 0.01$ , and <sup>#</sup> $p < 0.001$ . Based on Tukey's post-hoc test, mean values  
 298 sharing letter 'b' are not significantly different in the group at the 5% level.

## 299 Perceived quality of care

300 The minimum and maximum PQoC scores were 37.65 and 97.65, respectively. The mean score  
 301 was 70.28 (95% CI: 69.77, 70.78) with an SD of 8.39. The aggregated mean score at the health  
 302 center-level ranges from 64.94 to 74.06. Patient-provider communication had the highest mean  
 303 score (M=77.84, SD=10.12) of the five quality dimensions, while information provision had the



304 lowest score (M=64.67, SD=13.87). The mean score for each measurement item is summarized  
 305 by online supplemental file 2.

306 An independent t-test and a one-way ANOVA were performed to compare the mean scores of  
 307 PQoC and its dimensions between subgroups. As shown under Table 1, there was a significant  
 308 difference in the PQoC mean score for wealth tertile at  $p < 0.05$  ( $F = 8.83$ ,  $p = 0.001$ ). Tukey's post-  
 309 hoc test indicated that the mean score of PQoC for the lowest wealth tertile (M=71.77,  
 310 SD=9.15) was significantly different from both the medium (M=69.36, SD=8.16) and highest  
 311 (M=69.70, SD=7.62) wealth tertile. However, no significant difference was seen between  
 312 medium and high wealth tertile. The ANOVA test also showed that the PQoC mean score  
 313 showed significant differences based on the respondents perceived health status and time to a  
 314 recent visit to a health center, with ( $F = 8.04$ ,  $p < 0.001$ ) and ( $F = 4.78$ ,  $p < 0.01$ ), respectively. There  
 315 was a significant difference in the mean score of PQoC between active insurance members  
 316 (M=3.53, SD=0.41) and ex-members (M=3.38, SD=0.48);  $t = 3.96$ ,  $p < 0.001$ . The mean PQoC  
 317 score of households with chronic illness (M=3.62, SD=0.42) was also significantly higher  
 318 compared to those who did not have chronic illness (M=3.48, SD=0.42);  $t = 4.95$ ,  $p < 0.001$ . The  
 319 results of an independent t-test and a one-way ANOVA that compare the differences in mean  
 320 scores of the five dimensions between subgroups is displayed by Table 2.

321 Table 2: Independent t-test and one-way ANOVA comparing mean scores of PQoC dimensions (20-100 scale)  
 322 across respondent characteristics in two districts of northeast Ethiopia, 2021

| Variables    | N   | Technical care |       | Communication |      | Information provision |       | Access to care |       | Trust in providers |       |
|--------------|-----|----------------|-------|---------------|------|-----------------------|-------|----------------|-------|--------------------|-------|
|              |     | M              | SD    | M             | SD   | M                     | SD    | M              | SD    | M                  | SD    |
| Age in years |     |                |       |               |      |                       |       |                |       |                    |       |
| 25 – 44      | 389 | 68.33          | 15.61 | 77.60         | 9.89 | 62.75 <sup>b</sup>    | 13.73 | 69.99          | 11.64 | 73.59 <sup>b</sup> | 10.11 |

|                          |      |                    |       |                    |       |                     |       |                    |       |                    |       |
|--------------------------|------|--------------------|-------|--------------------|-------|---------------------|-------|--------------------|-------|--------------------|-------|
| 45 – 64                  | 555  | 68.14              | 15.19 | 77.71              | 10.01 | 64.60 <sup>b</sup>  | 14.03 | 69.41              | 12.04 | 73.61 <sup>b</sup> | 10.96 |
| 65+                      | 137  | 69.15              | 14.44 | 79.03              | 11.19 | 70.36 <sup>#</sup>  | 12.09 | 68.25              | 10.97 | 70.46 <sup>§</sup> | 13.21 |
| Gender                   |      |                    |       |                    |       |                     |       |                    |       |                    |       |
| Men                      | 938  | 68.36              | 15.15 | 77.67              | 10.17 | 64.40               | 13.80 | 69.34              | 11.67 | 73.18              | 10.80 |
| Women                    | 143  | 68.48              | 16.00 | 78.93              | 9.81  | 66.40               | 14.27 | 70.31              | 12.42 | 73.38              | 12.37 |
| Marital status           |      |                    |       |                    |       |                     |       |                    |       |                    |       |
| Divorced/widowed         | 78   | 70.77              | 14.74 | 78.80              | 12.10 | 70.77 <sup>#</sup>  | 13.58 | 67.18              | 13.03 | 72.31              | 14.01 |
| Married                  | 1003 | 68.15              | 15.27 | 77.76              | 9.96  | 64.19               | 13.79 | 69.65              | 11.65 | 73.27              | 10.75 |
| Formal education         |      |                    |       |                    |       |                     |       |                    |       |                    |       |
| No                       | 855  | 68.37              | 15.41 | 77.78              | 10.29 | 64.43               | 13.98 | 69.63              | 11.64 | 73.39              | 11.13 |
| Yes                      | 226  | 68.20              | 14.62 | 78.05              | 9.54  | 65.55               | 13.46 | 68.89              | 12.24 | 72.51              | 10.56 |
| Household size           |      |                    |       |                    |       |                     |       |                    |       |                    |       |
| < Five                   | 403  | 69.10              | 15.21 | 78.51              | 10.07 | 65.14               | 14.31 | 70.37              | 11.25 | 73.18              | 11.94 |
| ≥ Five                   | 678  | 67.89              | 15.25 | 77.43              | 10.14 | 64.39               | 13.61 | 68.94              | 12.04 | 73.22              | 10.44 |
| Wealth tertile           |      |                    |       |                    |       |                     |       |                    |       |                    |       |
| Lowest                   | 361  | 69.64              | 14.42 | 79.56 <sup>#</sup> | 9.94  | 70.21 <sup>a#</sup> | 12.84 | 68.70              | 11.49 | 72.13 <sup>a</sup> | 13.07 |
| Medium                   | 360  | 67.11              | 15.28 | 76.80 <sup>b</sup> | 10.57 | 63.08 <sup>a</sup>  | 14.40 | 69.00              | 11.82 | 73.02 <sup>a</sup> | 10.45 |
| Highest                  | 360  | 68.26              | 15.93 | 77.13 <sup>b</sup> | 9.65  | 60.69 <sup>a</sup>  | 12.54 | 70.63              | 11.94 | 74.46 <sup>a</sup> | 9.04  |
| Insurance status         |      |                    |       |                    |       |                     |       |                    |       |                    |       |
| Ex-member                | 139  | 64.75 <sup>§</sup> | 15.73 | 74.29 <sup>§</sup> | 12.91 | 63.13               | 14.46 | 67.05 <sup>§</sup> | 13.56 | 70.79 <sup>§</sup> | 13.07 |
| Active-member            | 942  | 68.87              | 15.10 | 78.36              | 9.54  | 64.89               | 13.78 | 69.83              | 11.44 | 73.56              | 10.64 |
| Self-rated health        |      |                    |       |                    |       |                     |       |                    |       |                    |       |
| Fair                     | 207  | 71.76 <sup>b</sup> | 13.73 | 80.35 <sup>#</sup> | 9.55  | 70.02 <sup>#</sup>  | 12.87 | 68.62              | 11.51 | 72.59 <sup>†</sup> | 11.83 |
| Good                     | 511  | 68.85 <sup>b</sup> | 14.73 | 76.73 <sup>b</sup> | 10.06 | 63.86 <sup>b</sup>  | 13.95 | 69.18              | 11.14 | 74.16 <sup>a</sup> | 9.83  |
| Very-good                | 363  | 65.67 <sup>#</sup> | 16.31 | 77.96 <sup>b</sup> | 10.29 | 62.74 <sup>b</sup>  | 13.59 | 70.37              | 12.71 | 72.21 <sup>a</sup> | 11.99 |
| Chronic illness          |      |                    |       |                    |       |                     |       |                    |       |                    |       |
| No                       | 803  | 67.39 <sup>#</sup> | 15.58 | 77.30 <sup>§</sup> | 10.35 | 63.09 <sup>#</sup>  | 13.74 | 69.13              | 11.90 | 73.07              | 10.94 |
| Yes                      | 278  | 71.08              | 13.90 | 79.38              | 9.29  | 69.21               | 13.26 | 70.47              | 11.33 | 73.60              | 11.25 |
| Last health center visit |      |                    |       |                    |       |                     |       |                    |       |                    |       |
| < 3 months               | 499  | 68.08              | 15.10 | 78.46              | 10.25 | 68.07 <sup>#</sup>  | 13.95 | 68.88 <sup>b</sup> | 11.49 | 71.77 <sup>#</sup> | 12.20 |
| 3-6 months               | 239  | 69.71              | 14.79 | 77.68              | 9.97  | 62.97 <sup>b</sup>  | 12.90 | 71.67 <sup>§</sup> | 11.28 | 75.06 <sup>b</sup> | 9.31  |
| 6-12 months              | 343  | 67.76              | 15.74 | 77.03              | 10.02 | 60.90 <sup>b</sup>  | 13.26 | 68.80 <sup>b</sup> | 12.34 | 73.99 <sup>b</sup> | 10.01 |
| Total                    | 1081 | 68.34              | 15.24 | 77.84              | 10.12 | 64.67               | 13.87 | 69.47              | 11.77 | 73.20              | 11.02 |

323 Statistical significance for t-test/F-test is indicated by \*  $p < 0.05$ , §  $p < 0.01$ , and #  $p < 0.001$ . Based on Tukey's post-hoc test, mean  
 324 values sharing letter 'a' are significantly different; while mean values sharing letter 'b' are not significantly different in the group  
 325 at the 5% level.

326 The mean PQoC score was significantly different among health centers ( $F = 11.85$ ,  $p < 0.001$ ). The

327 mean scores for the five dimensions were also significantly different among health centers at

328  $p < 0.001$  level: technical care ( $F=8.66$ ), patient-provider communication ( $F=6.65$ ), information  
329 provision ( $F=47.42$ ), access to care ( $F=36.87$ ) and trust in care providers ( $F=6.98$ ). The mean  
330 scores of the PQoC and its dimensions across the 12 health centers are depicted using a radar  
331 chart (Figure 1). The chart shows a comparison of mean scores on a scale of 10 to 90. For  
332 example, respondents from 11 health centers had a higher perception score on patient-  
333 provider communication than other dimensions with less variation, while the information  
334 provision dimension was mostly ranked lowest with more variability.

335  
336 Figure 1: Summary of the mean scores of the PQoC and its dimensions across 12 health centers  
337 in two districts of northeast Ethiopia, 2021

### 338 **Predictors of perceived quality of care: Multilevel analysis**

339 The fixed effects (measures of association) and the random effects (measures of variation) for  
340 the multilevel linear regression model are depicted in Table 3. In the null model, 8.5% of the  
341 total variance in PQoC was attributed to cluster-level variables. The variability between clusters  
342 was statistically significant ( $\tau=5.90$ ,  $p < 0.001$ ). Furthermore, the null model shows a significant  
343 improvement in fit relative to a standard linear model, demonstrating the importance of  
344 developing a multilevel model. The cluster-level variation in Model II remained significant  
345 ( $\tau=6.33$ ,  $p < 0.001$ ), with 9.31% of the total variability attributed to differences across clusters.  
346 The PCV was negative in this model, indicating that individual-level characteristics did not play a  
347 role in explaining the between cluster variation. In Model III, cluster-level variables accounted

348 for just 1.33% of the variation in PQoC across clusters. The PCV showed that cluster-level  
349 variables explained 85.42% of the between health centers variation, indicating the importance  
350 of including cluster-level characteristics to build a more robust explanatory model. We  
351 interpreted the results of the regression analysis using Model IV, which has the lowest DIC and  
352 AIC.

353 After adjusting for other individual and cluster-level factors, the mean PQoC score for  
354 households with higher wealth tertile increased by 1.79 points compared to those with lower  
355 wealth tertile ( $b=1.79$ ; 95% CI: 0.37, 3.21). Households who were active members of CBHI at the  
356 time of the study had a 2.70-point higher PQoC score than ex-members ( $b=2.70$ ; 95% CI: 1.25,  
357 4.14). The PQoC score of households who rated their health status as very-good was 1.80 points  
358 lower compared to those who rated it as fair ( $b=-1.80$ ; 95% CI: -3.31, -0.29). Compared to  
359 households without a chronic illness, those with one or more family members with a chronic  
360 illness had a 1.42 point higher perception score ( $b=1.42$ ; 95% CI: 0.22, 2.63). Time to a recent  
361 visit to a health center was also significantly associated with PQoC score. The mean score for  
362 households who had their most recent visit to a health center before 3-6 months was 1.89  
363 points higher compared to those whose recent visit was within 3-months prior to the study  
364 ( $b=1.89$ ; 95% CI: 0.61, 3.17).

365 Regarding cluster-level variables, the average work experience of health care providers and  
366 patient volume had statistically significant associations with PQoC. A 1.07-point improvement in  
367 the average PQoC score of health centers was noted for every year increase in the median work

368 experience of health care providers ( $b=1.07$ ; 95% CI: 0.74, 1.40). An interaction term between  
369 patient volume and job satisfaction was positively associated with PQoC, implying that  
370 increasing staff job satisfaction would buffer or lessen the effect between patient volume and  
371 PQoC. At an average staff job satisfaction, a 0.42-point drop in the average PQoC score of  
372 health centers was observed for a unit increase in patient volume ( $b=-0.42$ ; 95% CI: -0.50, -  
373 0.33). A one-unit increase in patient volume would only result in a 26% fall in average PQoC if  
374 the average job satisfaction is set one SD above the mean. This prediction was substantiated by  
375 the fact that the margins graph for patient volume showed the flattest slope for high job  
376 satisfaction. However, the buffering role is observed in health centers with an average patient  
377 volume of 30.75 or higher.

## 378 **DISCUSSIONS**

379 If insured households consider the quality of care they receive under health insurance is  
380 optimal, they will maintain their membership.<sup>18 19</sup> In this study, the mean PQoC score was  
381 70.28 from a scale of 20-100 with an SD of 8.39. The patient-provider communication received  
382 the highest score ( $M=77.84$ ,  $SD=10.12$ ) among the five quality dimensions. In 2015, the  
383 Ethiopian government incorporated the development of caring, respectful and compassionate  
384 health care providers as one of the main transformation agendas in its five-year strategic plan.<sup>27</sup>  
385 Our finding may be attributed partly to the government's ongoing training initiative aimed at  
386 producing caring, respectful and compassionate health care providers. The perception score for  
387 the information provision dimension, on the other hand, was the lowest ( $M=64.67$ ,  $SD=13.87$ ).

388 This could be attributed to an increase in patient volume following the implementation of  
 389 CBHI.<sup>26</sup> Items loaded under this dimension appear less practical in the presence of a larger  
 390 patient load. If health care providers are required to treat a large number of patients,  
 391 consultation times will be reduced. They are unlikely to provide the necessary information to  
 392 their clients if they are under time constraints. Regarding item level observations, waiting time  
 393 and medicine availability received the lowest perception scores (62.96 and 63.50, respectively),  
 394 which could also be related to increased patient load. This is consistent with previous studies in  
 395 Ethiopia, which showed insured clients frequently complain about a lack of medicine and long  
 396 wait times at CBHI-affiliated health facilities.<sup>42 43</sup>

397 Table 3: Multilevel linear regression analysis of factors associated with PQoC among households ever enrolled in a  
 398 CBHI scheme in two districts of northeast Ethiopia, 2021

| Variables                |               | Model I | Model II                       | Model III                      | Model IV                       |
|--------------------------|---------------|---------|--------------------------------|--------------------------------|--------------------------------|
|                          | Category      |         | b (95% CI)                     | b (95% CI)                     | b (95% CI)                     |
| <b>Fixed effects</b>     |               |         |                                |                                |                                |
| Age                      |               |         | -0.02 (-0.06, 0.03)            |                                | -0.03 (-0.07, 0.02)            |
| Gender                   | Women         |         | 0.64 (-1.06, 2.34)             |                                | 0.80 (-0.88, 2.49)             |
| Marital status           | Married       |         | -0.14 (-2.42, 2.15)            |                                | 0.18 (-2.09, 2.45)             |
| Modern education         | Yes           |         | -0.07 (-1.34, 1.19)            |                                | -0.25 (-1.49, 1.00)            |
| Wealth tertile           | Medium        |         | -0.57 (-1.89, 0.74)            |                                | -0.16 (-1.40, 1.09)            |
|                          | High          |         | 0.73 (-0.87, 2.34)             |                                | 1.79 (0.37, 3.21)*             |
| Household size           | Large (≥ 5)   |         | -0.28 (-1.28, 0.72)            |                                | -0.31 (-1.31, 0.68)            |
| Insurance status         | Active member |         | 2.65 (1.20, 4.11) <sup>#</sup> |                                | 2.70 (1.25, 4.14) <sup>#</sup> |
| Perceived health status  | Good          |         | -0.75 (-2.16, 0.66)            |                                | -0.73 (-2.14, 0.67)            |
|                          | Very-good     |         | -1.78 (-3.29, -0.26)*          |                                | -1.80 (-3.31, -0.29)*          |
| Chronic illness          | Yes           |         | 1.55 (0.34, 2.76)*             |                                | 1.42 (0.22, 2.63)*             |
| Last health center visit | 3-6 months    |         | 1.64 (0.35, 2.94)*             |                                | 1.89 (0.61, 3.17) <sup>§</sup> |
|                          | 6-12 months   |         | 0.77 (-0.45, 1.99)             |                                | 1.02 (-0.18, 2.21)             |
| Work experience          |               |         |                                | 0.75 (0.33, 1.17) <sup>§</sup> | 1.07 (0.74, 1.40) <sup>#</sup> |

|                                   |                          |                          |                                   |                                   |
|-----------------------------------|--------------------------|--------------------------|-----------------------------------|-----------------------------------|
| Affective commitment              |                          |                          | 0.48 (0.04, 1.00)                 | 0.27 (-0.10, 0.65)                |
| Patient volume                    |                          |                          | -0.33 (-0.45, -0.21) <sup>#</sup> | -0.42 (-0.50, -0.33) <sup>#</sup> |
| Job satisfaction                  |                          |                          | 0.01 (-0.24, 0.27)                | 0.07 (-0.10, 0.24)                |
| Patient volume x Job satisfaction |                          |                          | 0.06 (0.02, 0.11) <sup>§</sup>    | 0.05 (0.02, 0.08) <sup>§</sup>    |
| <b>Random effect</b>              |                          |                          |                                   |                                   |
| $\tau$ (SE)                       | 5.90 (2.78) <sup>#</sup> | 6.33 (3.10) <sup>#</sup> | 0.86 (0.94)                       | ≈ 0.00                            |
| ICC (%)                           | 8.50                     | 9.31                     | 1.33                              | ≈ 0.00                            |
| PCV (%)                           | Reference                | -7.29                    | 85.42                             | ≈ 100                             |
| <b>Model fitness</b>              |                          |                          |                                   |                                   |
| DIC                               | 7578.01                  | 7528.89                  | 7572.79                           | 7516.90                           |
| AIC                               | 7584.01                  | 7560.89                  | 7588.79                           | 7558.90                           |

399 \* $p < 0.05$ ; <sup>§</sup> $p < 0.01$ ; <sup>#</sup> $p < 0.001$ ;  $\tau$  - Cluster-level variance, ICC - Intraclass Correlation; PCV - Proportional Change in Variance; DIC -  
400 Deviance Information Criterion; AIC - Akaike Information Criterion; SE – standard error; b - regression coefficient; CI –  
401 Confidence Interval.

402 Results of the regression analysis revealed that households with higher wealth tertile had a  
403 higher PQoC score than those with lower wealth tertile. This is in contrast to other studies,<sup>15 44</sup>  
404 whereby the richest group had a lower perception score. This discrepancy could be attributed  
405 to the use of different metrics to assess quality of care. People with higher economic status  
406 may be more aware of health issues and able to bargain with health care providers to obtain  
407 the best possible care. Furthermore, if prescribed medicines are not available in CBHI-affiliated  
408 health facilities (which is one of the lowest-rated items in this study), they can afford to buy  
409 from private pharmacies. On the contrary, it may be irritating for people with lower economic  
410 status to buy medicines with limited money or to forgo treatment due to lack of money. In this  
411 regard, they may develop a negative perception of the quality of care.

412 Households who were active members of CBHI at the time of the study had a higher rating of  
413 PQoC compared to ex-members. Contrary to our finding, a study in Ghana showed that

414 previously insured clients had a higher perception of quality of care compared to actively  
415 insured clients (statistical significance is not reported). The authors argue this was due to the  
416 more time-consuming nature of the service delivery processes for insured clients.<sup>45</sup> At least  
417 three possible explanations exist for the relationship between CBHI status and PQoC. First,  
418 because they do not have to pay for health care, active members have better access to and  
419 enjoy its benefits, resulting in a favorable perception of its quality. Second, the relationship  
420 could be due to an endogeneity issue. It is plausible that higher quality score reported by active  
421 members is due to their desire to stay in the scheme, which could be influenced by unobserved  
422 variables. We tested for endogeneity between current insurance status and PQoC using the  
423 Durbin–Wu–Hausman test, and the results showed no evidence of endogeneity. However,  
424 there is still the possibility of endogeneity due to omitted variables. Third, ex-members of CBHI  
425 may have had negative experiences with health services, which led to the decision to  
426 discontinue their membership. As a result, they would be critical in rating the quality of care  
427 provided. In support of the latter argument, it was evidenced that poor quality of care was a  
428 major reason for insurance members to leave the scheme.<sup>24 46</sup> Elsewhere, a statistically  
429 significant association was also reported between dropout and low quality of care.<sup>47 48</sup>

430 This study verified that the PQoC score of households who rated their health status as very-  
431 good was significantly lower compared to those who rated it as fair. The households' chronic  
432 illness experiences also influence the PQoC rating. The PQoC score of households with a chronic  
433 illness was higher compared to those without a chronic illness. This may be true for people who  
434 perceive their health as fair or who live with chronic conditions to appreciate the gains or



435 benefits of the health care they received. In this respect, they may be more likely than their  
436 counterparts to rate quality of care higher.

437 The results also indicated that households who had their most recent visit to a health center  
438 before 3-6 months had higher PQoC scores compared to those whose recent visit was within 3-  
439 months prior to the study. Patients may experience varying levels of emotional highs and lows,  
440 depending on the length of the most recent facility visit. Although patients' perceptions of  
441 quality may develop over time,<sup>5</sup> patients who recently visited a health facility may be more  
442 critical of the quality of care due to strong emotions attached to negative events or health  
443 services that fall short of their expectations.

444 Our findings revealed that the average work experience of health care providers was positively  
445 associated with PQoC. Work experience is linked to task specialization, which can lead to a  
446 faster work pace, more output in less time, and higher quality.<sup>49</sup> This could be more  
447 pronounced in Ethiopia, where the number of outpatient visits to CBHI-affiliated health centers  
448 had increased dramatically.<sup>26</sup> Providers with more experience take less time to make diagnoses  
449 and treatment decisions, while still providing recommended practical aspects of care, such as  
450 good communication, physical examination, and provision of relevant health information.<sup>49</sup> As a  
451 result, they can reduce waiting times, and their management outcomes may be more effective  
452 than inexperienced providers.

453 Conditional on the average staff job satisfaction, patient volume has a negative association with  
454 PQoC. A study in Ethiopia identified a non-linear significant association (an inverted U-shape)

455 between patient volume and quality. Quality decreased with increasing patient volume in  
456 health facilities that treated 90.6 or more patients per day, while quality increased with  
457 increasing patient volume in health facilities that treated less than 90.6 patients per day in the  
458 outpatient departments.<sup>50</sup> Our finding is consistent with a study at public hospitals in China,<sup>30</sup>  
459 where overcrowding was negatively associated with clients' perception of quality of care. There  
460 are two possible explanations for the observed relationship between patient volume and PQoC.  
461 First, increased patient volume would put a great deal of pressure on health care providers to  
462 treat a large number of patients in a short time. This may result in shorter consultation time  
463 and the omission of important practical aspects of care. Second, an increase in patient volume  
464 would mean longer waiting times at various service delivery points. Both these factors could  
465 have contributed to a negative patient experience and influenced their perception on overall  
466 quality of care. Some studies reported a positive relationship between patient volume and  
467 quality of basic maternal care, and postoperative infections.<sup>51 52</sup> The alternative direction of this  
468 relationship, in which quality drives patient volume, is based on the assumption that the  
469 provision of high-quality care will attract more patients. This may be true in areas where  
470 patients have access to competitive health care facilities, and health care providers are  
471 incentivized for providing higher quality care. This is not the case in low-income countries, like  
472 Ethiopia, where health care facilities are hard to reach for most rural populations. Members of  
473 CBHI are further limited to use health services only in public health facilities affiliated with the  
474 scheme.

475 This study found no relationship between staff job satisfaction and PQoC. This contrasts with  
476 the findings of Kvist et al,<sup>53</sup> which reported a positive relationship between job satisfaction  
477 among nursing staff and patients' perceptions of quality of care. Despite this, it moderates the  
478 relationship between patient volume and PQoC in a nonlinear fashion. Increased job  
479 satisfaction buffers the negative relationship between patient volume and PQoC in health  
480 centers with an average patient volume of 30.75 or higher. When the average patient volume is  
481 less than 30.75, however, an increase in job satisfaction enhances the effect between patient  
482 volume and PQoC. It is plausible that the buffering role of provider job satisfaction as patient  
483 volume rises indicates that provider job satisfaction is a result of the intrinsic rewards of higher  
484 work performance. Providers may also be fully available during working hours at the health  
485 facility due to the increased number of clients. On the other hand, the moderating role of  
486 enhancing the relationship as patient volume decreases could suggest that a low workload is  
487 one source of job satisfaction. Because clients are in small numbers, providers may not be fully  
488 engaged during working hours. They may have the freedom to do other businesses outside the  
489 health facility, leaving patients unattended and dissatisfied.

490 The findings of this study will be an essential input for quality improvement initiatives as well as  
491 addressing challenges in the country's efforts to establish higher-level insurance pools. This is  
492 the first study of its kind to consider cluster-level variables associated with PQoC in Ethiopia. It  
493 gives an important lesson to health care managers and other relevant stakeholders to consider  
494 cluster-level characteristics in healthcare quality improvement efforts. It also pointed out  
495 quality dimensions that require special consideration in managerial decisions. Despite the

496 significant findings of the current study, some caution should be taken in interpreting the  
497 findings. One noteworthy limitation of this study is the cross-sectional nature of the data. The  
498 study's analysis was conducted to identify for associations rather than prove causation. Second,  
499 the association between current insurance status and PQoC could be due to the possibility of  
500 endogeneity. Third, patient volume data based on secondary data may not reflect the true  
501 figure due to the possibility of under or over reporting.

## 502 **CONCLUSIONS**

503 Despite encouraging findings on patient-provider communication, much work remains to be  
504 done to improve information provision and access to care quality dimensions. According to the  
505 findings, people's perceptions of quality of care varied depending on a variety of individual and  
506 cluster-level factors. The household's wealth status, current insurance membership, perceived  
507 health status, presence of chronic illness in the household, and time to a recent visit to a health  
508 center were individual-level predictors of PQoC. At the cluster-level, patient volume and work  
509 experience of health care providers were associated with PQoC. A lower patient volume allows  
510 the health care provider to devote more time and attention to each patient, address their  
511 patients' individual needs, and have more time to improve communication with and provide  
512 behavior change counseling, which has an impact on quality of care.<sup>54</sup> Therefore, to ensure that  
513 patients have access to a better quality of care, it is critical to determine an appropriate patient  
514 volume per care provider. Staff job satisfaction was an important factor that buffers the effect  
515 between patient volume and PQoC. Hence, it is vital to devise mechanisms to improve staff job

516 satisfaction, especially in health facilities with higher patient volume. More importantly, health  
517 centers should go to great lengths to ensure that every patient has access to the necessary  
518 medications. This will boost clients' trust in health care providers, which will be critical for  
519 health insurance schemes to retain and attract members.

520 **Acknowledgements** The authors would like to acknowledge the health offices of Tehulederie  
521 and Kallu districts, health extension workers, *Kebele* leaders, data collectors, supervisors, and  
522 study participants. I (MH) want to acknowledge Bahir Dar university for the opportunity it has given me  
523 to pursue my PhD study.

#### 524 **Contributors**

525 MH conceptualized the study, designed the study, collected the data, analyzed and interpreted  
526 the data, and drafted the manuscript. MA and NBB contributed to survey design, data  
527 collection and statistical analysis, and reviewed the manuscript. All authors read and approved  
528 the final manuscript.

529 **Funding** The authors have not declared a specific grant for this research from any funding  
530 agency in the public, commercial or not-for-profit sectors.

531 **Competing interests** None declared.

532 **Patient consent for publication** Not required.

533 **Ethics approval** Ethical approval was obtained from the Institutional Review Board (IRB) of  
534 College of Medicine and Health Science, Bahir Dar University with protocol number 001/2021. A  
535 support letter was communicated to the district health offices to gain entry permission into the

536 community where the research was conducted. Before the interview, verbal informed consent  
537 was secured from each of the study participants. Confidentiality was assured through collecting  
538 anonymous information and informing the participants that personal identifiers would not be  
539 revealed to a third party.

540 **Provenance and peer review** Not commissioned; externally peer reviewed.

541 **Data availability statement** Data are available in a public, open access repository. The datasets  
542 generated, and analyzed during the current study are available in the Dryad repository, at  
543 <https://doi.org/10.5061/dryad.ncjsxksw5>

544 **Open access** This is an open access article distributed in accordance with the Creative  
545 Commons Attribution Non-Commercial (CC BY- NC 4.0) license, which permits others to  
546 distribute, remix, adapt, build upon this work non- commercially, and license their derivative  
547 works on different terms, provided the original work is properly cited, appropriate credit is  
548 given, any changes made indicated, and the use is non- commercial. See:  
549 <http://creativecommons.org/licenses/by-nc/4.0/> .

550 **ORCID iD**

551 Mohammed Hussien <https://orcid.org/0000-0002-5747-8967>

552 Muluken Azage <https://orcid.org/0000-0003-3222-0158>

553 Negalign Berhanu Bayou <https://orcid.org/0000-0002-0975-8358>

## 554 **REFERENCES**

555 1. Nash DB, Joshi MS, Ransom ER, et al. The healthcare quality book : vision, strategy, and  
556 tools. 4th ed. Washington, DC: *Health Administration Press* 2019.

- 557 2. WHO, OECD, and, et al. Delivering quality health services: a global imperative for universal  
558 health coverage. Geneva: World Health Organization, Organisation for Economic Co-  
559 operation and Development, and The World Bank, 2018.
- 560 3. Larson E, Sharma J, Bohren MA, et al. When the patient is the expert: measuring patient  
561 experience and satisfaction with care. *Bull World Health Organ* 2019;97(8):563-69. doi:  
562 10.2471/BLT.18.225201 [published Online First: 2019/08/07]
- 563 4. National Academies of Sciences Engineering and Medicine. Crossing the global quality  
564 chasm: Improving health care worldwide. Washington (DC): The National Academies  
565 Press 2018.
- 566 5. Hanefeld J, Powell-Jackson T, Balabanova D. Understanding and measuring quality of care:  
567 dealing with complexity. *Bull World Health Organ* 2017 2017;95:368–74. doi:  
568 10.2471/BLT.16.179309
- 569 6. Goodrich J, Fitzsimons B. Capturing patient experience to improve healthcare services. *Nurs*  
570 *Stand* 2019;34(8):24-28. doi: 10.7748/ns.2018.e111177 [published Online First:  
571 2018/11/02]
- 572 7. Golda N, Beeson S, Kohli N, et al. Analysis of the patient experience measure. *JAM ACAD*  
573 *DERMATOL* 2018;78(4) doi: 10.1016/j.jaad.2017.03.051
- 574 8. Fujisawa R, Klazinga NS. Measuring patient experiences (PREMS): Progress made by the  
575 OECD and its member countries between 2006 and 2016. OECD Health Working Papers  
576 102. Paris, 2017.
- 577 9. Doyle C, Lennox L, Bell D. A systematic review of evidence on the links between patient  
578 experience and clinical safety and effectiveness. *BMJ Open* 2013;3(1) doi:  
579 10.1136/bmjopen-2012-001570
- 580 10. Anhang Price R, Elliott MN, Zaslavsky AM, et al. Examining the role of patient experience  
581 surveys in measuring health care quality. *Med Care Res Rev* 2014;71(5):522-54. doi:  
582 10.1177/1077558714541480 [published Online First: 2014/07/17]
- 583 11. Soors W, Devadasan N, Durairaj V, et al. Community Health Insurance and Universal  
584 Coverage: Multiple paths, many rivers to cross. Geneva: World Health Organization,  
585 2010.
- 586 12. Lagomarsino G, Garabrant A, Adyas A, et al. Moving towards universal health coverage:  
587 health insurance reforms in nine developing countries in Africa and Asia. *The Lancet*  
588 2012;380(9845):933-43. doi: 10.1016/s0140-6736(12)61147-7 [published Online First:  
589 2012/09/11]

- 590 13. Lagomarsino G, Kundra SS. Overcoming the Challenges of Scaling Voluntary Risk Pools in  
591 Low-Income Settings: Results for Development Institute, 2008.
- 592 14. Boateng D, Awunyor-Vitor D. Health insurance in Ghana: evaluation of policy holders'  
593 perceptions and factors influencing policy renewal in the Volta region. *Int J Equity*  
594 *Health* 2013;12:50. doi: 10.1186/1475-9276-12-50 [published Online First: 2013/07/05]
- 595 15. Alhassan RK, Duku SO, Janssens W, et al. Comparison of Perceived and Technical  
596 Healthcare Quality in Primary Health Facilities: Implications for a Sustainable National  
597 Health Insurance Scheme in Ghana. *PLoS One* 2015;10(10):e0140109. doi:  
598 10.1371/journal.pone.0140109 [published Online First: 2015/10/16]
- 599 16. Aggrey M, Appiah SCY. The influence of clients' perceived quality on health care  
600 utilization. *International Journal of Innovation and Applied Studies* 2014;9(2):918-24.
- 601 17. Akachi Y, Kruk ME. Quality of care: measuring a neglected driver of improved health. *Bull*  
602 *World Health Organ* 2017;95(6):465-72. doi: 10.2471/BLT.16.180190 [published Online  
603 First: 2017/06/13]
- 604 18. Dror DM, Hossain SAS, Majumdar A, et al. What Factors Affect Voluntary Uptake of  
605 Community-Based Health Insurance Schemes in Low- and Middle-Income Countries? A  
606 Systematic Review and Meta-Analysis. *PLoS One* 2016;11(8):e0160479. doi:  
607 10.1371/journal.pone.0160479 [published Online First: 2016/09/01]
- 608 19. Fadlallah R, El-Jardali F, Hemadi N, et al. Barriers and facilitators to implementation, uptake  
609 and sustainability of community-based health insurance schemes in low- and middle-  
610 income countries: a systematic review. *Int J Equity Health* 2018;17(1):13. doi:  
611 10.1186/s12939-018-0721-4 [published Online First: 2018/01/31]
- 612 20. Primary Health Care on the Road to Universal Health Coverage: 2019 global monitoring  
613 report. Geneva: WHO, UNICEF, UNFPA, OECD and World Bank., 2019.
- 614 21. Kruk ME, Gage AD, Arsenault C, et al. High-quality health systems in the Sustainable  
615 Development Goals era: time for a revolution. *The Lancet* 2018;6(11):e1196-e252. doi:  
616 10.1016/S2214-109X(18)30386-3 [published Online First: 2018/09/10]
- 617 22. Alhassan RK, Nketiah-Amponsah E, Arhinful DK. A Review of the National Health  
618 Insurance Scheme in Ghana: What Are the Sustainability Threats and Prospects? *PLoS*  
619 *One* 2016;11(11):e0165151. doi: 10.1371/journal.pone.0165151 [published Online First:  
620 2016/11/11]
- 621 23. Adebayo EF, Uthman OA, Wiysonge CS, et al. A systematic review of factors that affect  
622 uptake of community-based health insurance in low-income and middle-income  
623 countries. *BMC Health Serv Res* 2015;15(543):543. doi: 10.1186/s12913-015-1179-3  
624 [published Online First: 2015/12/10]



- 625 24. Hussien M, Azage M. Barriers and Facilitators of Community-Based Health Insurance Policy  
626 Renewal in Low- and Middle-Income Countries: A Systematic Review. *Clinicoecon*  
627 *Outcomes Res* 2021;13:359-75. doi: 10.2147/CEOR.S306855 [published Online First:  
628 2021/05/20]
- 629 25. Tefera BB, Kibret MA, Molla YB, et al. The interaction of healthcare service quality and  
630 community-based health insurance in Ethiopia. *PLoS One* 2021;16(8):e0256132. doi:  
631 10.1371/journal.pone.0256132 [published Online First: 2021/08/20]
- 632 26. Shigute Z, Mebratie AD, Sparrow R, et al. The Effect of Ethiopia's Community-Based Health  
633 Insurance Scheme on Revenues and Quality of Care. *Int J Environ Res Public Health*  
634 2020;17(22) doi: 10.3390/ijerph17228558 [published Online First: 2020/11/22]
- 635 27. FMHO. Health Sector Transformation Plan 2016-2020. Addis Ababa, Ethiopia: Federal  
636 Ministry of Health, 2015.
- 637 28. Zonal Health Department. Community-based health insurance performance report of South  
638 Wollo Zone, 2020.
- 639 29. Robyn PJ, Bärnighausen T, Souares A, et al. Does enrollment status in community-based  
640 insurance lead to poorer quality of care? Evidence from Burkina Faso. *International*  
641 *Journal for Equity in Health* 2013;12(31)
- 642 30. Bao Y, Fan G, Zou D, et al. Patient experience with outpatient encounters at public hospitals  
643 in Shanghai: Examining different aspects of physician services and implications of  
644 overcrowding. *PLoS One* 2017;12(2) doi: 10.1371/journal.pone.0171684
- 645 31. Hu Y, Zhang Z, Xie J, et al. The Outpatient Experience Questionnaire of comprehensive  
646 public hospital in China: development, validity and reliability. *Int J Qual Health Care*  
647 2017;29(1):40-46. doi: 10.1093/intqhc/mzw133
- 648 32. Baltussen R, Ye Y. Quality of care of modern health services as perceived by users and non-  
649 users in Burkina Faso. *Int J Qual Health Care* 2006;18(1):30-34.
- 650 33. Webster TR, Mantopoulos J, Jackson E, et al. A brief questionnaire for assessing patient  
651 healthcare experiences in low-income settings. *Int J Qual Health Care* 2011;23(3):258-  
652 68.
- 653 34. Benson T, Potts HW. A short generic patient experience questionnaire: howRwe  
654 development and validation. *BMC Health Serv Res* 2014;14:499. doi: 10.1186/s12913-  
655 014-0499-z [published Online First: 2014/10/22]
- 656 35. Shirom A, Nirel N, Vinokur AD. Overload, Autonomy, and Burnout as Predictors of  
657 Physicians' Quality of Care. *J Occup Health Psychol* 2006;11(4):328-42. doi:  
658 10.1037/1076-8998.11.4.328

- 659 36. Altindis S. Job motivation and organizational commitment among the health professionals: A  
660 questionnaire survey *Afr J Bus Manage* 2011;5(21):8601-09.
- 661 37. Alpern R, Canavan ME, Thompson JT, et al. Development of a brief instrument for assessing  
662 healthcare employee satisfaction in a low-income setting. *PLoS One* 2013;8(11):e79053.  
663 doi: 10.1371/journal.pone.0079053 [published Online First: 2013/11/14]
- 664 38. Hair JF, Black WC, Babin BJ, et al. *Multivariate Data Analysis*. 8th ed: CENAGE 2019.
- 665 39. Elff M, Heisig JP, Schaeffer M, et al. Multilevel Analysis with Few Clusters: Improving  
666 Likelihood-Based Methods to Provide Unbiased Estimates and Accurate Inference.  
667 *British Journal of Political Science* 2020;51(1):412-26. doi:  
668 10.1017/s0007123419000097
- 669 40. Snijders TAB, Bosker RJ. *Multilevel Analysis: An Introduction To Basic And Advanced*  
670 *Multilevel Modeling*. 2nd ed. London, UK: SAGE 2012.
- 671 41. Merlo J, Chaix B, Yang M, et al. A brief conceptual tutorial of multilevel analysis in social  
672 epidemiology: linking the statistical concept of clustering to the idea of contextual  
673 phenomenon. *J Epidemiol Community Health* 2005;59(6):443-9. doi:  
674 10.1136/jech.2004.023473 [published Online First: 2005/05/25]
- 675 42. Mebratie AD, Sparrow R, Yilma Z, et al. Enrollment in Ethiopia's Community-Based Health  
676 Insurance Scheme. *World Development* 2015;74:58-76. doi:  
677 10.1016/j.worlddev.2015.04.011
- 678 43. Benjamin J, Haile M, Abebe Z. *Community-Based Health Insurance Program in Ethiopia:  
679 Assessing Institutional and Financial Sustainability*. Rockville, MD: Health Finance &  
680 Governance Project, Abt Associates Inc., 2018.
- 681 44. Amo-Adjei J, Anku PJ, Amo HF, et al. Perception of quality of health delivery and health  
682 insurance subscription in Ghana. *BMC Health Serv Res* 2016;16:317. doi:  
683 10.1186/s12913-016-1602-4 [published Online First: 2016/07/31]
- 684 45. Duku SKO, Nketiah-Amponsah E, Janssens W, et al. Perceptions of healthcare quality in  
685 Ghana: Does health insurance status matter? *PLoS One* 2018;13(1):e0190911. doi:  
686 10.1371/journal.pone.0190911 [published Online First: 2018/01/18]
- 687 46. Eseta WA, Lemma TD, Geta ET. Magnitude and Determinants of Dropout from Community-  
688 Based Health Insurance Among Households in Manna District, Jimma Zone, Southwest  
689 Ethiopia. *Clinicoecon Outcomes Res* 2020;12:747-60. doi: 10.2147/CEOR.S284702  
690 [published Online First: 2020/12/29]

- 691 47. Herberholz C, Fakihammed WA. Determinants of Voluntary National Health Insurance  
692 Drop-Out in Eastern Sudan. *Appl Health Econ Health Policy* 2016;15(2):215-26. doi:  
693 10.1007/s40258-016-0281-y [published Online First: 2016/10/04]
- 694 48. Mladovsky P. Why do people drop out of community-based health insurance? Findings from  
695 an exploratory household survey in Senegal. *Soc Sci Med* 2014;107:78-88. doi:  
696 10.1016/j.socscimed.2014.02.008 [published Online First: 2014/03/13]
- 697 49. Kraus TW, Buchler MW, Herfarth C. Relationships between volume, efficiency, and quality  
698 in surgery--a delicate balance from managerial perspectives. *World J Surg*  
699 2005;29(10):1234-40. doi: 10.1007/s00268-005-7988-5 [published Online First:  
700 2005/09/02]
- 701 50. Arsenault C, Yakob B, Tilahun T, et al. Patient volume and quality of primary care in  
702 Ethiopia: findings from the routine health information system and the 2014 Service  
703 Provision Assessment survey. *BMC Health Serv Res* 2021;21(1) doi: 10.1186/s12913-  
704 021-06524-y
- 705 51. Kruk ME, Leslie HH, Verguet S, et al. Quality of basic maternal care functions in health  
706 facilities of five African countries: an analysis of national health system surveys. *The*  
707 *Lancet Global Health* 2016;4(11):e845-e55. doi: 10.1016/s2214-109x(16)30180-2
- 708 52. Kruse FM, van Nieuw Amerongen MC, Borghans I, et al. Is there a volume-quality  
709 relationship within the independent treatment centre sector? A longitudinal analysis.  
710 *BMC Health Serv Res* 2019;19(1):853. doi: 10.1186/s12913-019-4467-5 [published  
711 Online First: 2019/11/23]
- 712 53. Kvist T, Voutilainen A, Mäntynen R, et al. The relationship between patients' perceptions of  
713 care quality and three factors: nursing staff job satisfaction, organizational characteristics  
714 and patient age *BMC Health Serv Res* 2014;14(466)
- 715 54. Raffoul M, Moore M, Kamerow D, et al. A Primary Care Panel Size of 2500 Is neither  
716 Accurate nor Reasonable. *J Am Board Fam Med* 2016;29(4):496-9. doi:  
717 10.3122/jabfm.2016.04.150317 [published Online First: 2016/07/09]

718

719

720 Figure 2: Summary of the mean scores of the PQoC and its dimensions across 12 health centers  
721 in two districts of northeast Ethiopia, 2021

722

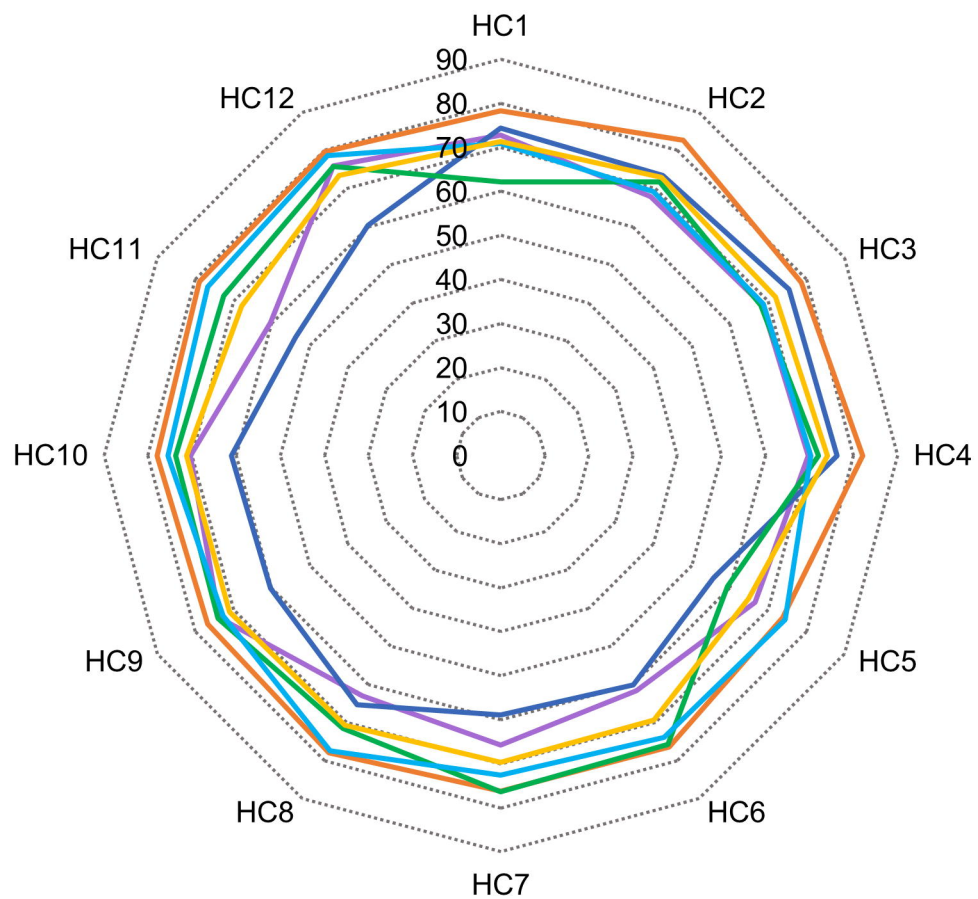

Technical care  
Information provision  
Trust in providers

Communication  
Access to care  
Overall PQOC
