# Supplementary material for: Perceived quality of care among households ever enrolled in a community-based health insurance scheme in two districts of northeast Ethiopia: a multilevel analysis
Source: bioRxiv or medRxiv preprint supplement (doi:10.1101/2021.10.18.21265144), 2022-06-07
Supplement: Supplementary file [file media-2.pdf]

Supplementary file 2: Mean score of each measurement item of the perceived quality of care (20-100 scale) among households enrolled in a CBHI in two districts of northeast Ethiopia, 2021

| Factors and items                                                             | 95% CI       |              |              |              |
|-------------------------------------------------------------------------------|--------------|--------------|--------------|--------------|
|                                                                               | Mean         | SD           | LCI          | UCI          |
| <b>Technical care</b>                                                         | <b>68.34</b> | <b>15.24</b> | <b>67.43</b> | <b>69.25</b> |
| The necessary Laboratory tests were performed                                 | 69.20        | 18.36        | 68.10        | 70.29        |
| Health care providers perform the necessary physical examinations             | 68.23        | 18.89        | 67.11        | 69.36        |
| Health care providers make good diagnosis                                     | 67.59        | 17.69        | 66.53        | 68.64        |
| <b>Patient-provider communication</b>                                         | <b>77.84</b> | <b>10.12</b> | <b>77.23</b> | <b>78.44</b> |
| Health care providers actively ask questions to understand your situation     | 80.39        | 11.68        | 79.69        | 81.09        |
| Health care providers listened to you carefully what you had to say           | 79.61        | 10.93        | 78.96        | 80.26        |
| Health care providers treated you with courtesy and respect                   | 73.51        | 16.72        | 72.51        | 74.50        |
| <b>Information provision</b>                                                  | <b>64.67</b> | <b>13.87</b> | <b>63.84</b> | <b>65.49</b> |
| Health care providers clearly explained the use and side effects of medicines | 62.90        | 19.87        | 61.72        | 64.09        |
| Health care providers clearly explained the results of tests and examination  | 62.50        | 19.48        | 61.34        | 63.66        |
| Health care providers explain things in a way you could understand            | 69.36        | 17.42        | 68.32        | 70.40        |
| Health care providers spent sufficient time to examine patients               | 63.90        | 20.18        | 62.70        | 65.11        |
| <b>Access to care</b>                                                         | <b>69.47</b> | <b>11.77</b> | <b>68.77</b> | <b>70.17</b> |
| Patients do not wait long in the health center to receive treatment           | 62.96        | 20.17        | 61.76        | 64.16        |
| All prescribed medicines are available on the spot                            | 63.50        | 20.37        | 62.28        | 64.71        |
| Facility assistants are friendly and helpful to patients                      | 73.38        | 16.07        | 72.42        | 74.34        |
| The health facility serves all patients fairly                                | 78.06        | 15.90        | 77.11        | 79.01        |
| <b>Trust in care providers</b>                                                | <b>73.20</b> | <b>11.02</b> | <b>72.55</b> | <b>73.86</b> |
| Treatment is effective for recovery and cure                                  | 72.47        | 14.78        | 71.59        | 73.35        |
| Health care providers prescribe appropriate medicines for patients            | 75.47        | 12.90        | 74.70        | 76.24        |
| You have confidence in the competence of health care providers                | 71.67        | 14.36        | 70.82        | 72.53        |
| <b>Overall perceived quality of care (PQoC)</b>                               | <b>70.28</b> | <b>8.39</b>  | <b>69.77</b> | <b>70.78</b> |
